# Supplementary material for: Cu(N-heterocyclic carbene)chloride: an efficient catalyst for multicomponent click reaction for the synthesis of 1,2,3-triazoles in water at room temperature
Source: Royal Society of Chemistry journal article supplement (doi:10.1039/c4ra08412h), 2014-09-10

**Cu(N-heterocyclic carbene)chloride: An efficient catalyst for multicomponent click reaction  
for the synthesis of 1,2,3-triazoles in water at room temperature**

*Vishal B. Purohit\*, Sharad C. Karad, Kirit H. Patel, Dipak K. Raval*

*Department of Chemistry, Sardar Patel University, Vallabh Vidyanagar- 388 120, Gujarat, India*

*\*Corresponding author. Tel.: +91-02692-226856 - Ext. - 208; Fax: +91-02692 236475.*

*E-mail: [vishalpurohit113@gmail.com](mailto:vishalpurohit113@gmail.com), [dipanalka@yahoo.com](mailto:dipanalka@yahoo.com)*

**Supplementary Information**

<sup>1</sup>H NMR spectra of Cu(NHC)Cl Catalyst

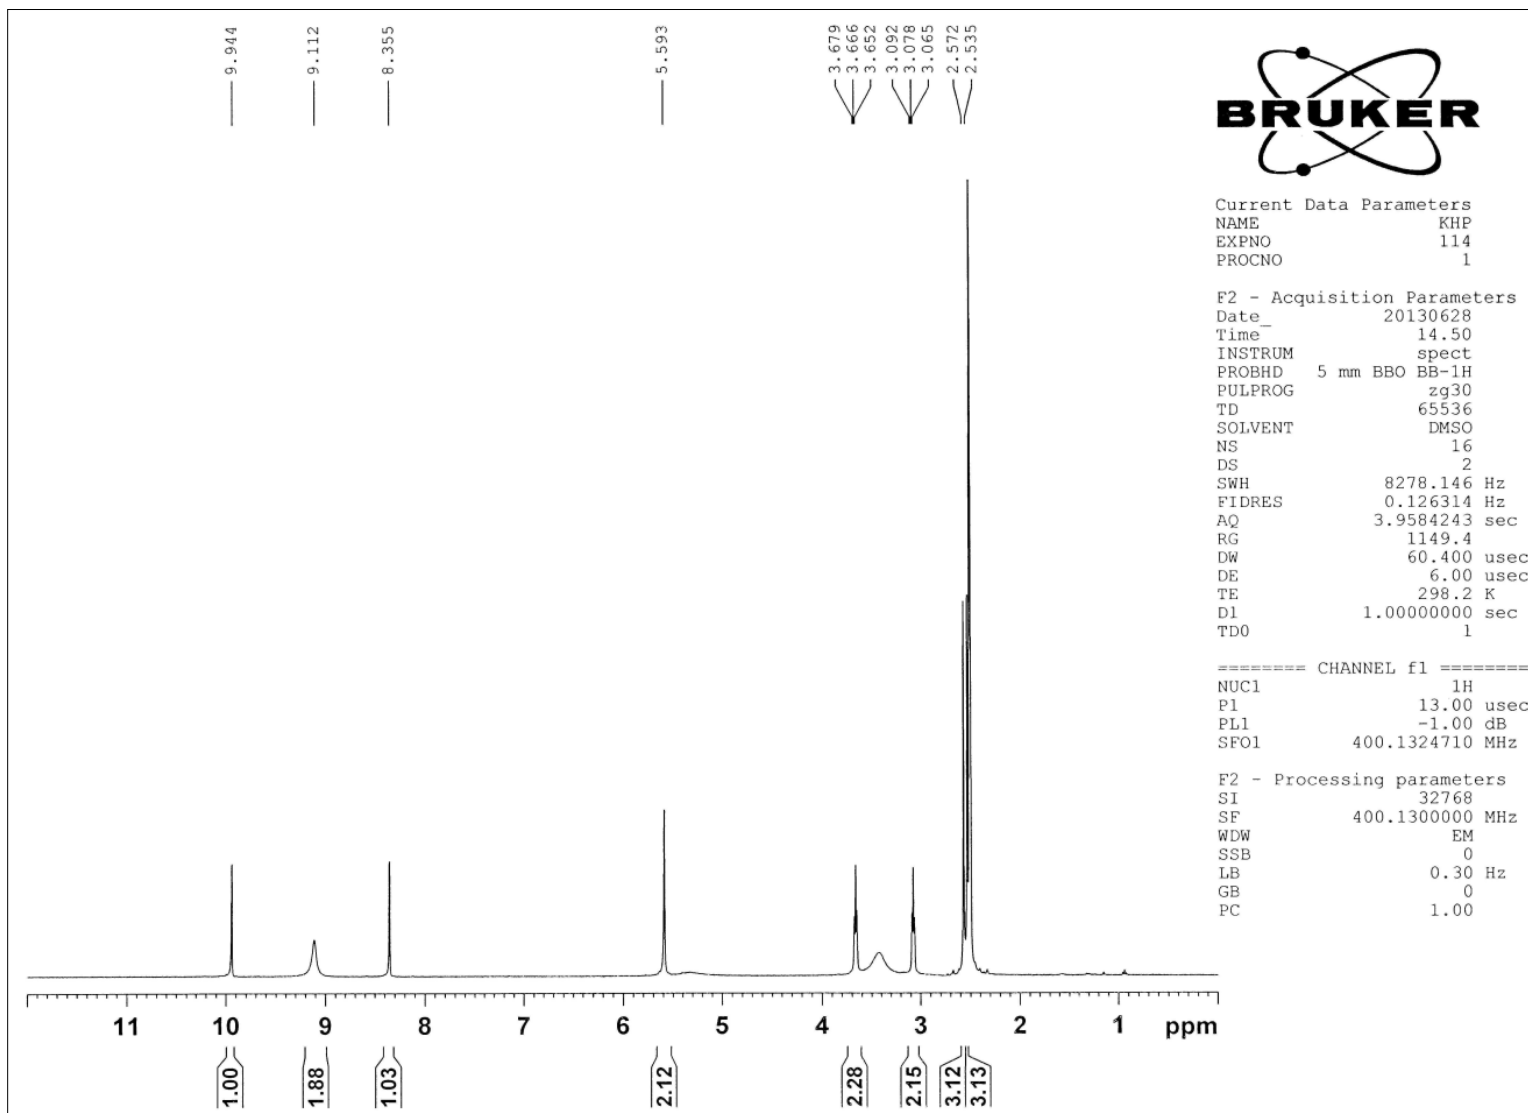

<sup>1</sup>H NMR spectra of compound 4a

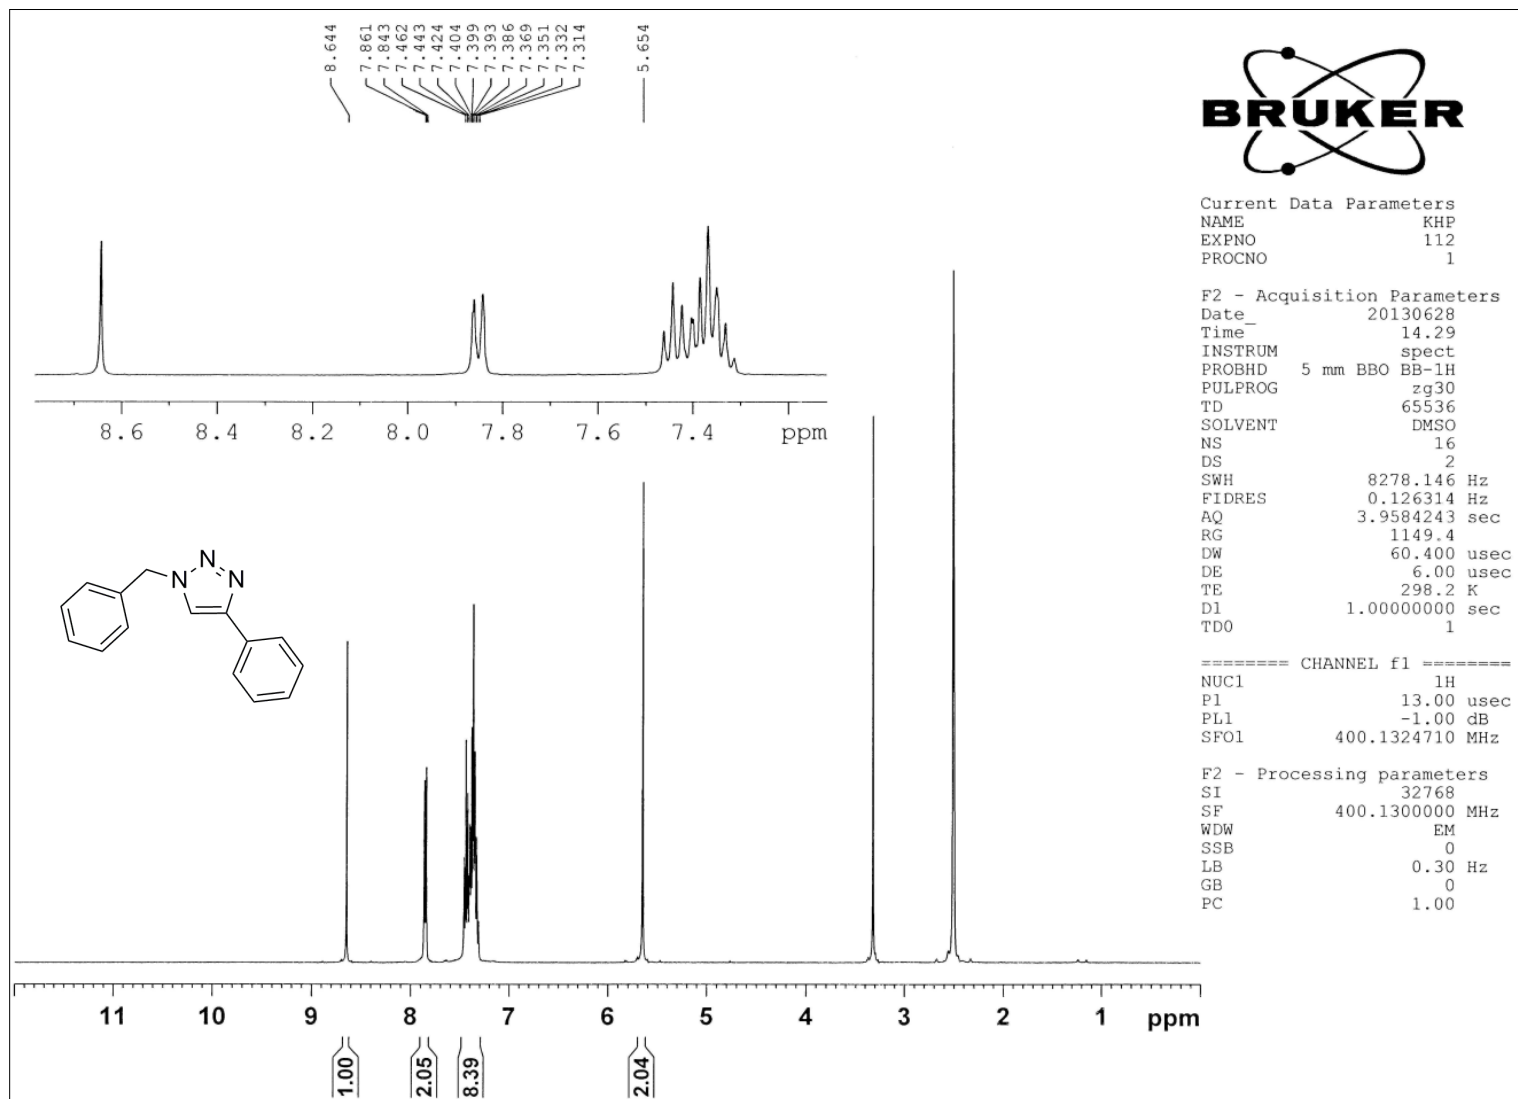

<sup>1</sup>H NMR spectra of compound **4b**

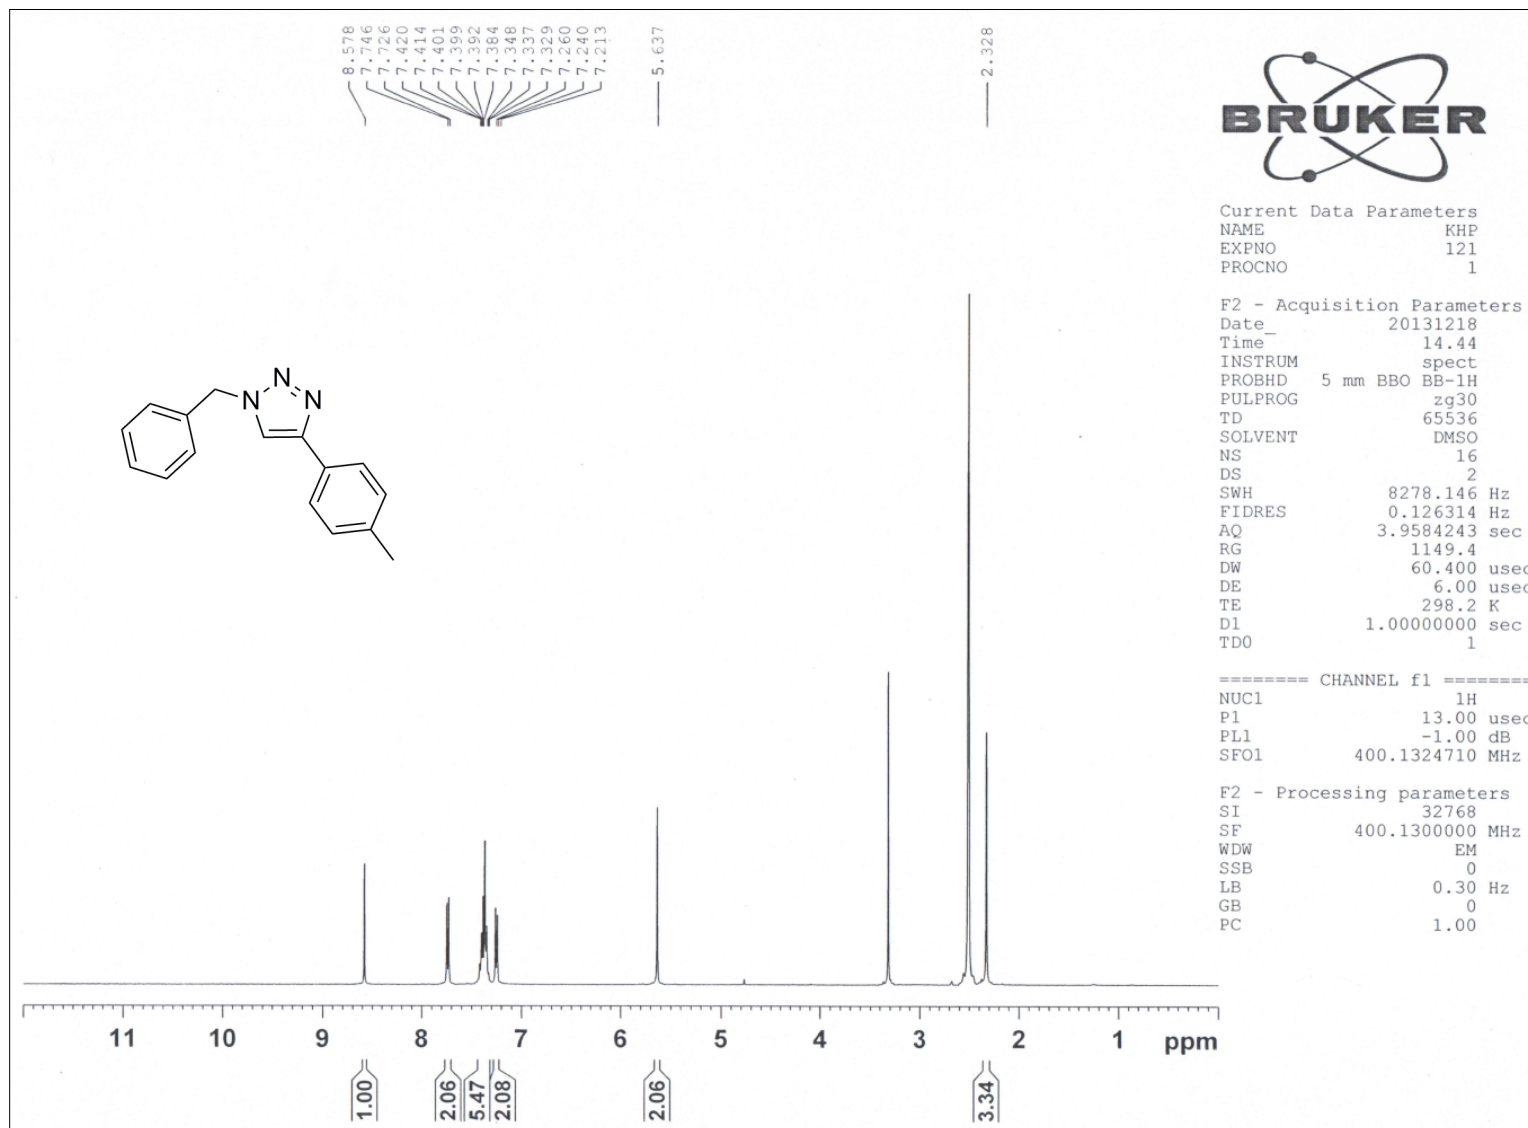

<sup>1</sup>H NMR spectra of compound 4c

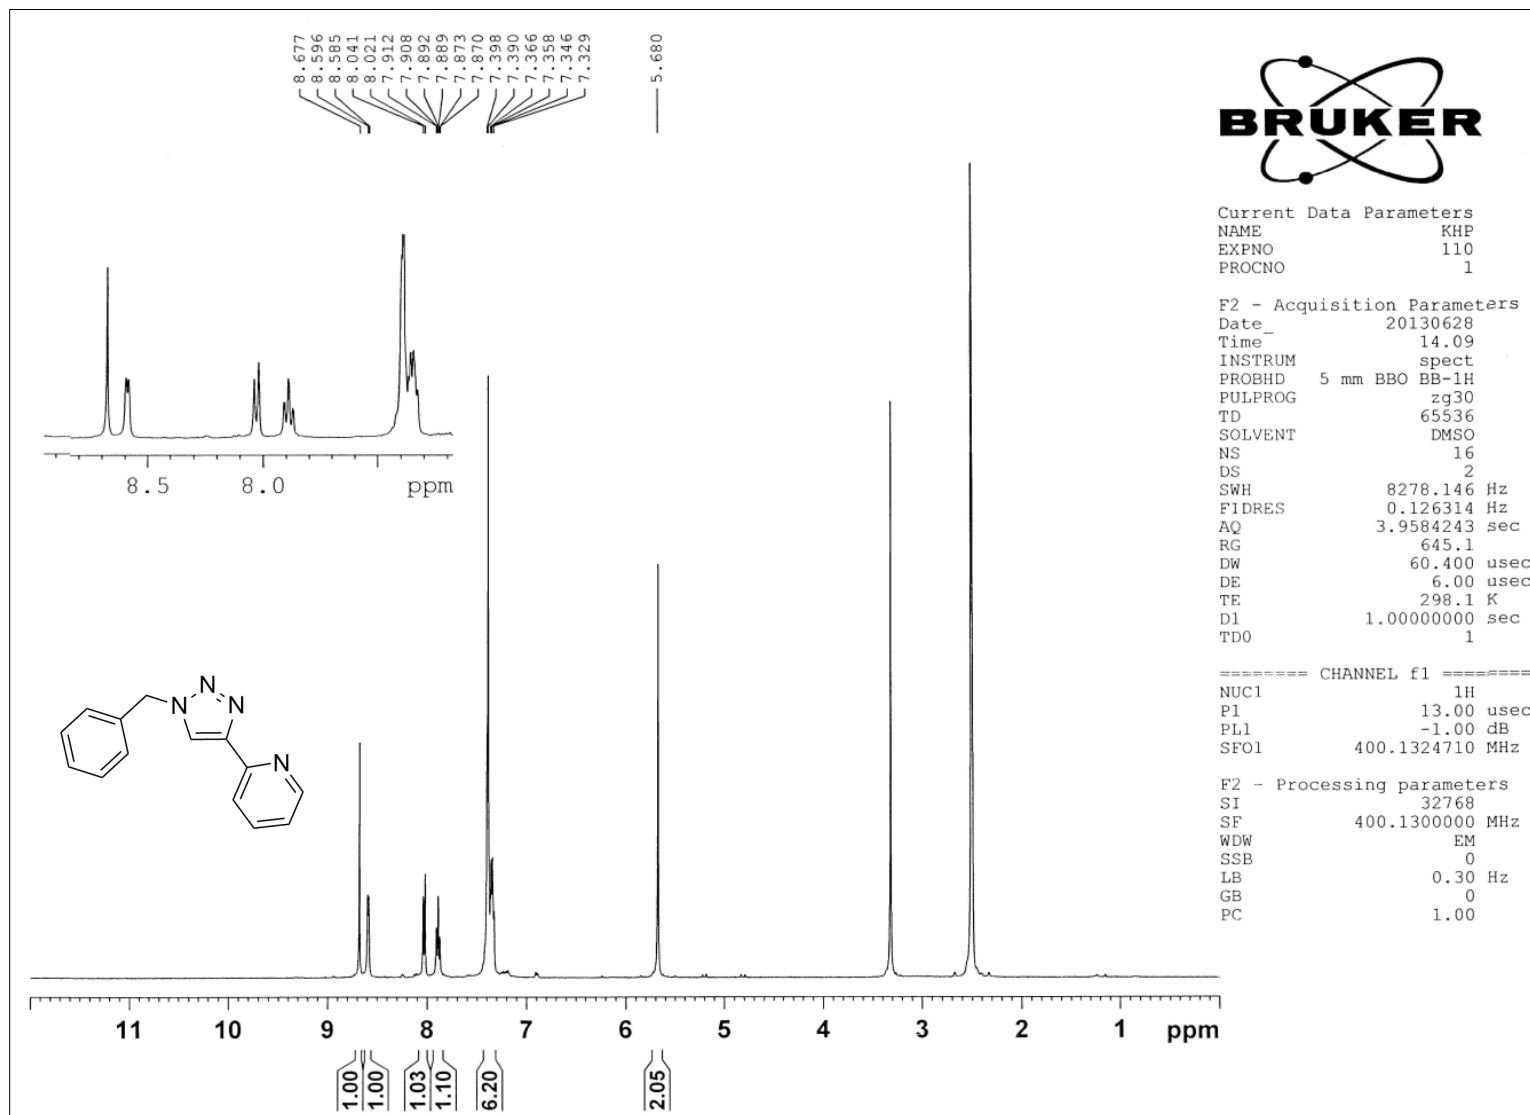

<sup>1</sup>H NMR spectra of compound 4d

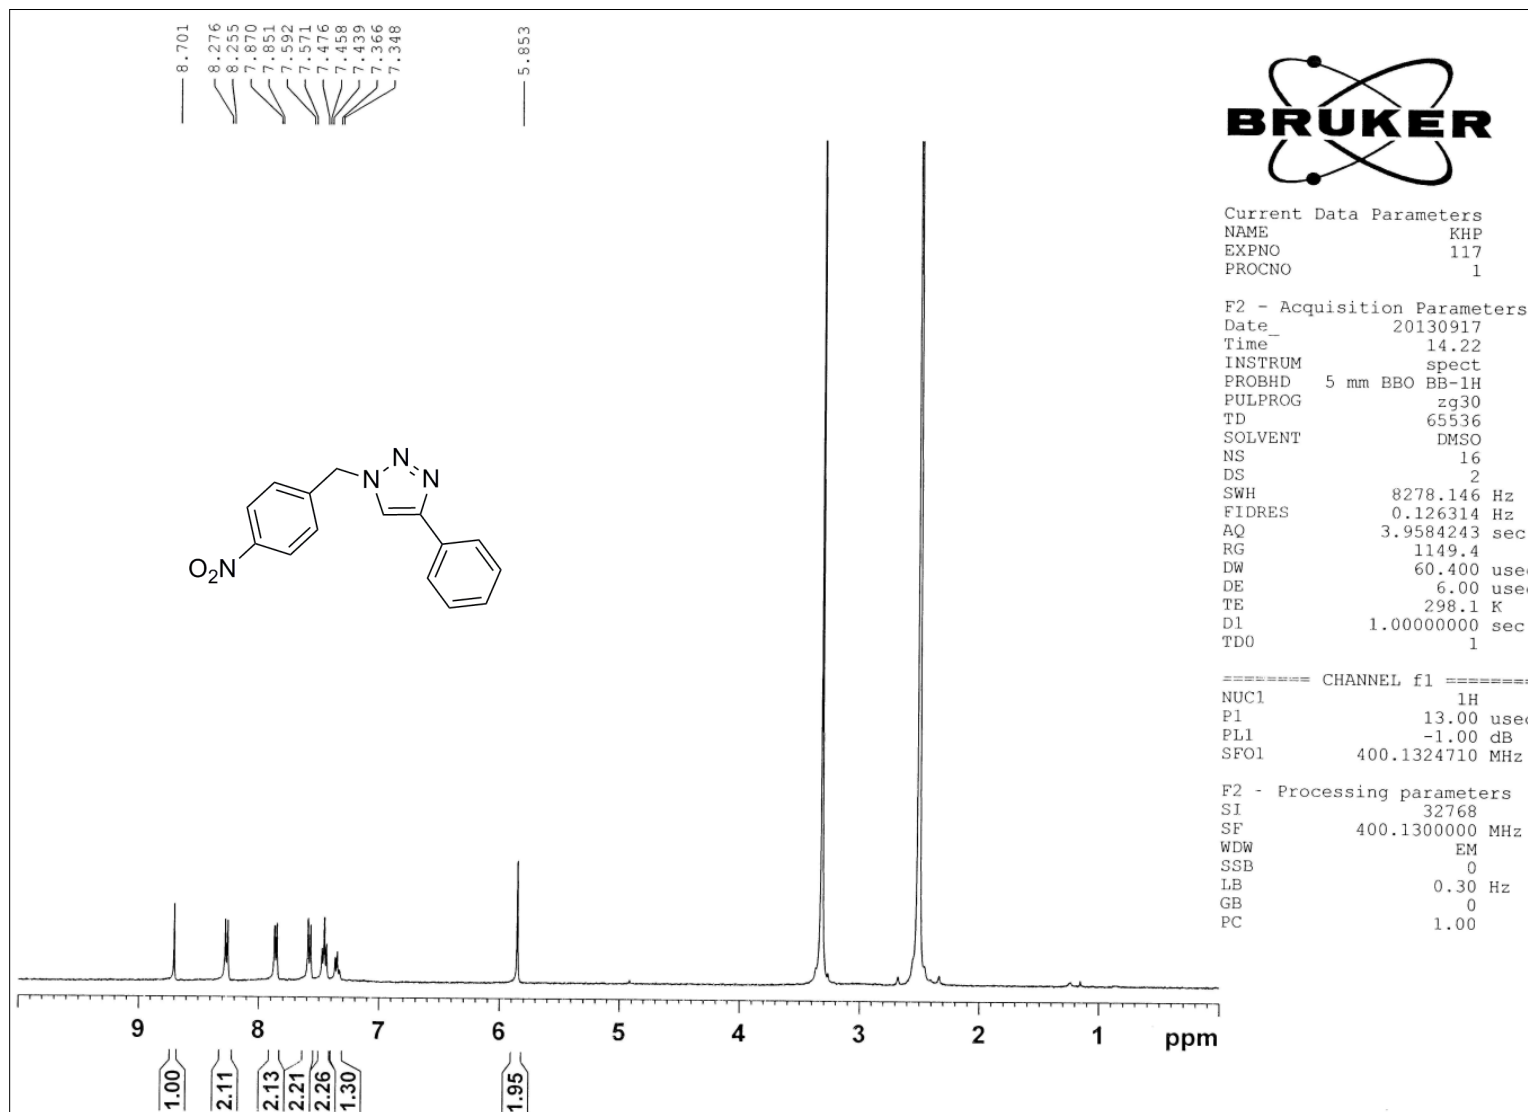

<sup>1</sup>H NMR spectra of compound 4e

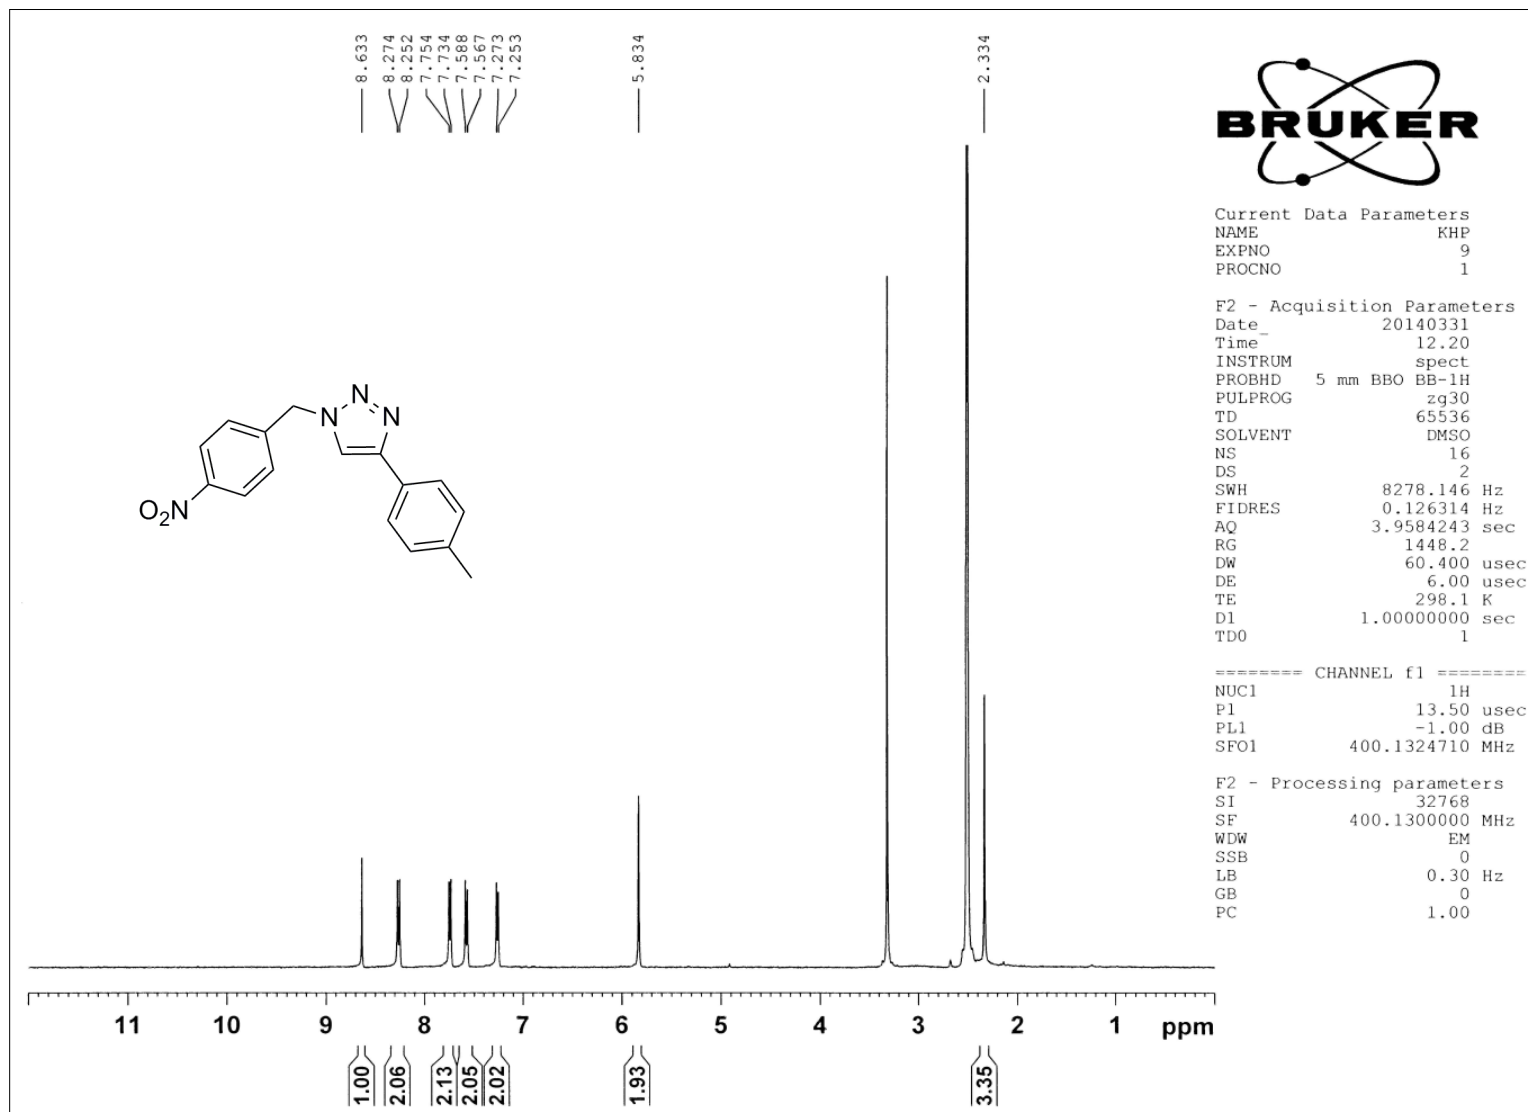

<sup>1</sup>H NMR spectra of compound 4f

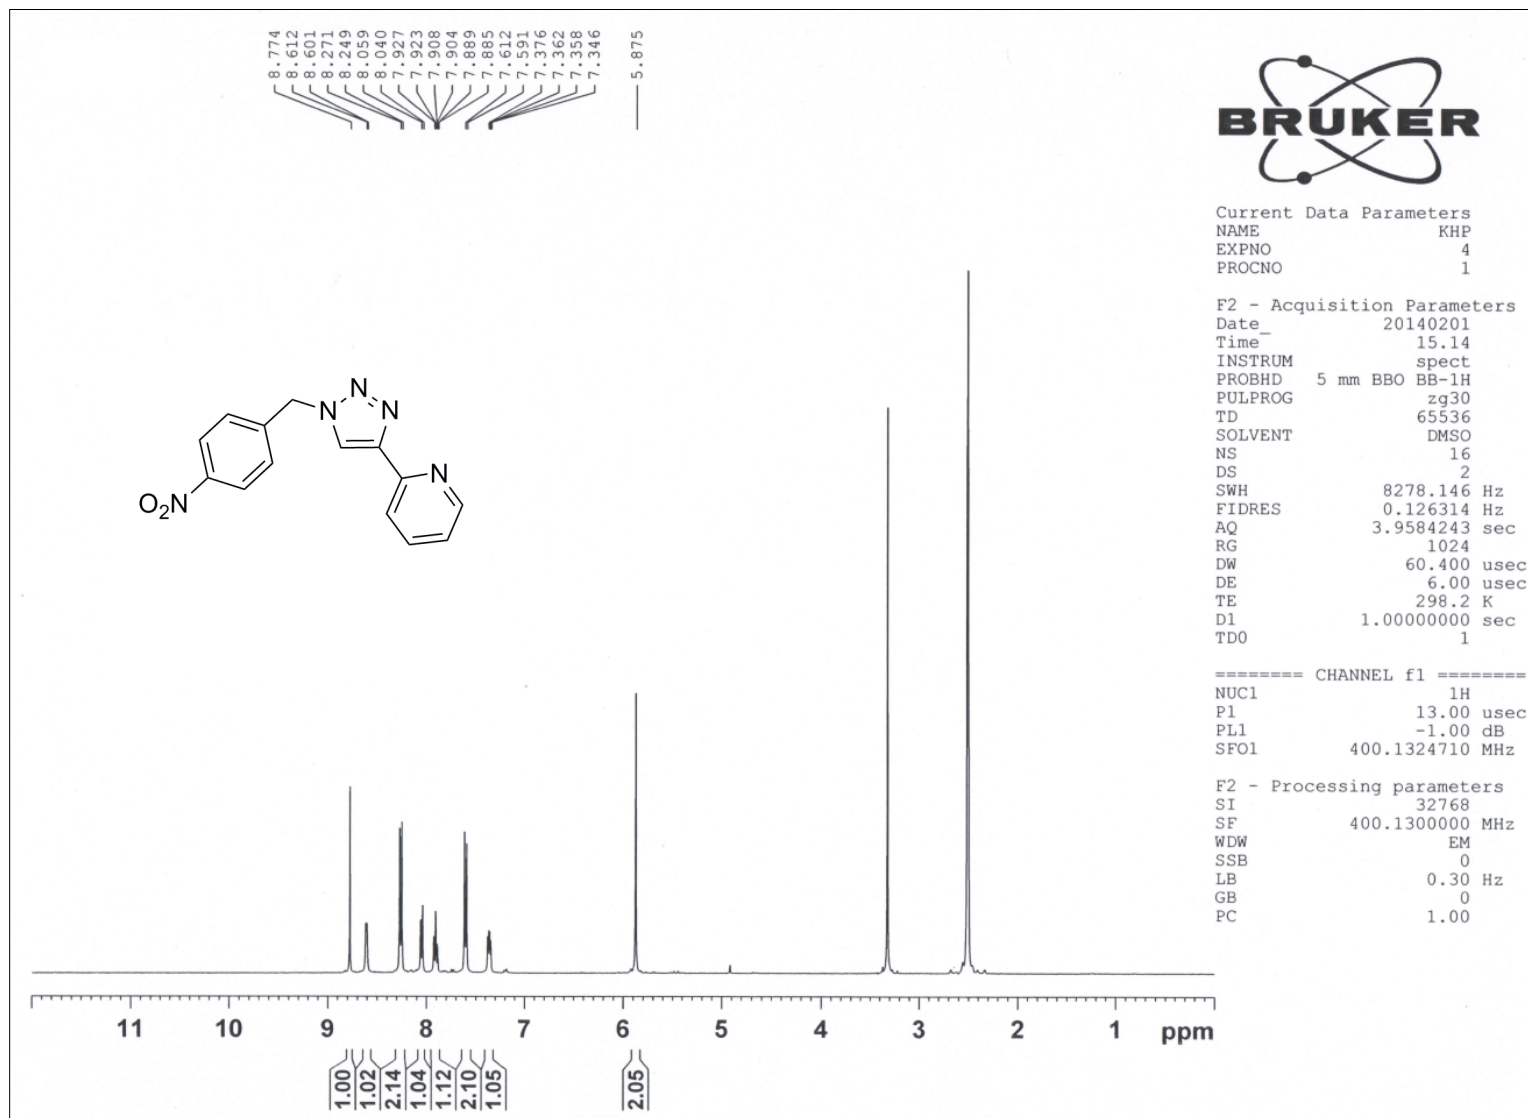



<sup>1</sup>H NMR spectra of compound 4g

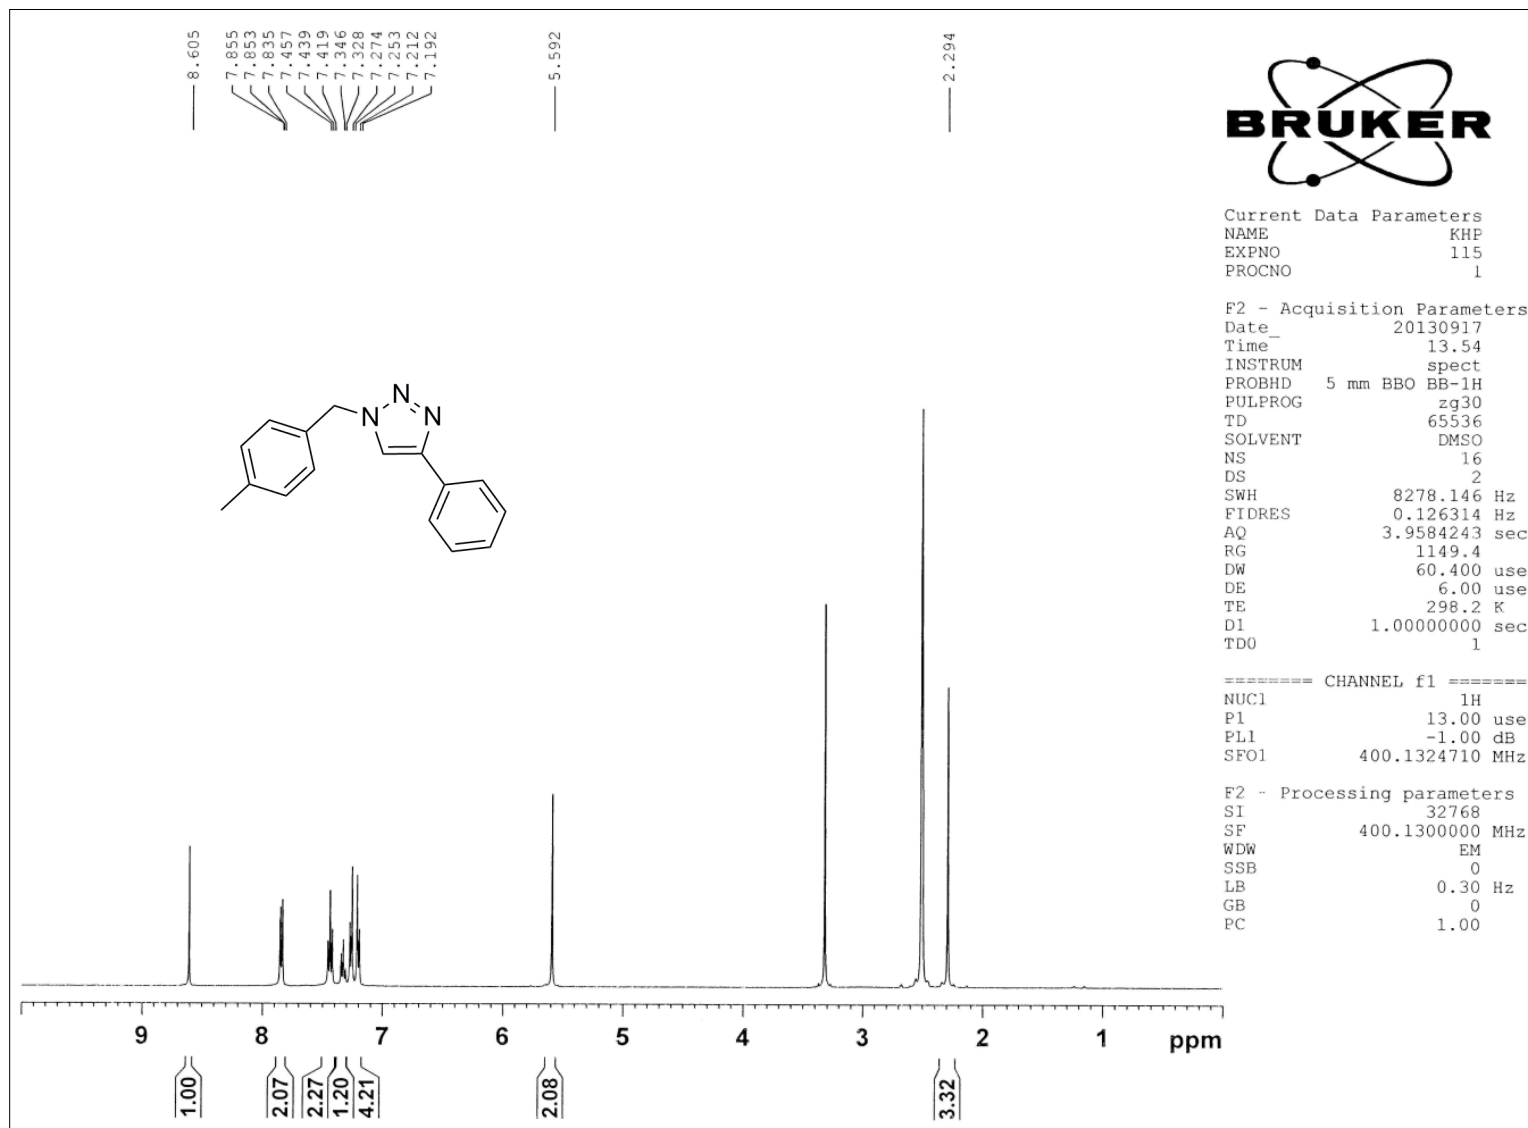

<sup>1</sup>H NMR spectra of compound 4h

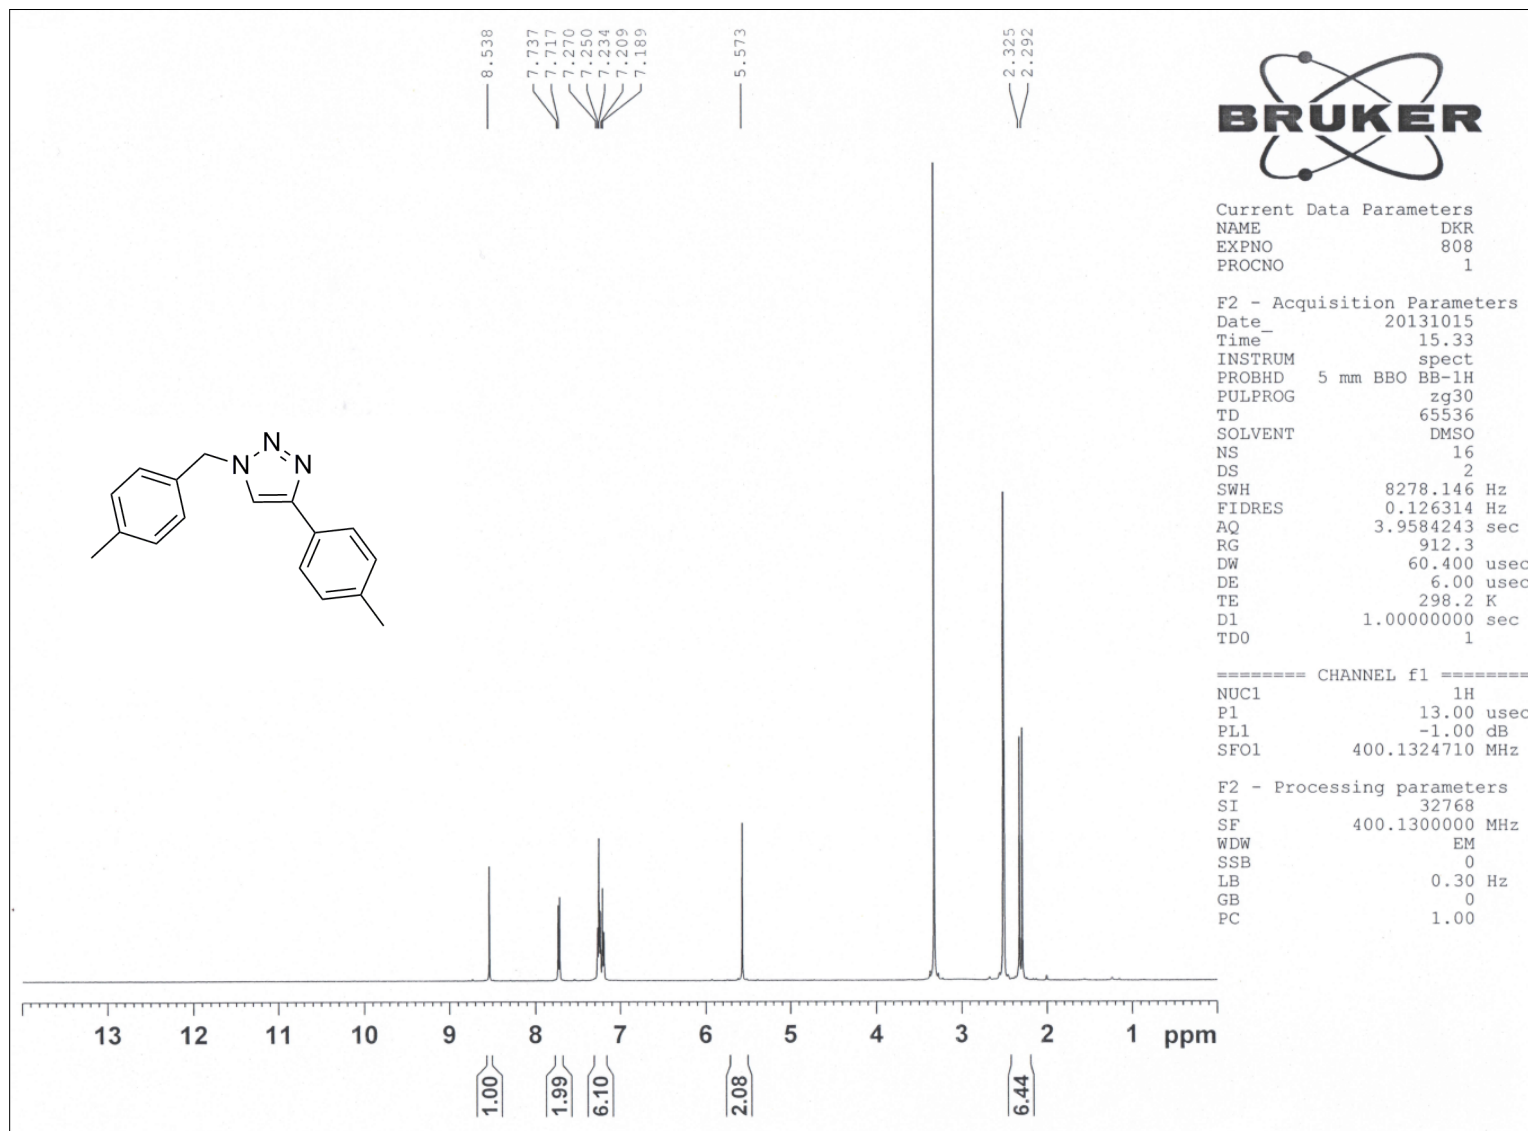

<sup>1</sup>H NMR spectra of compound 4i

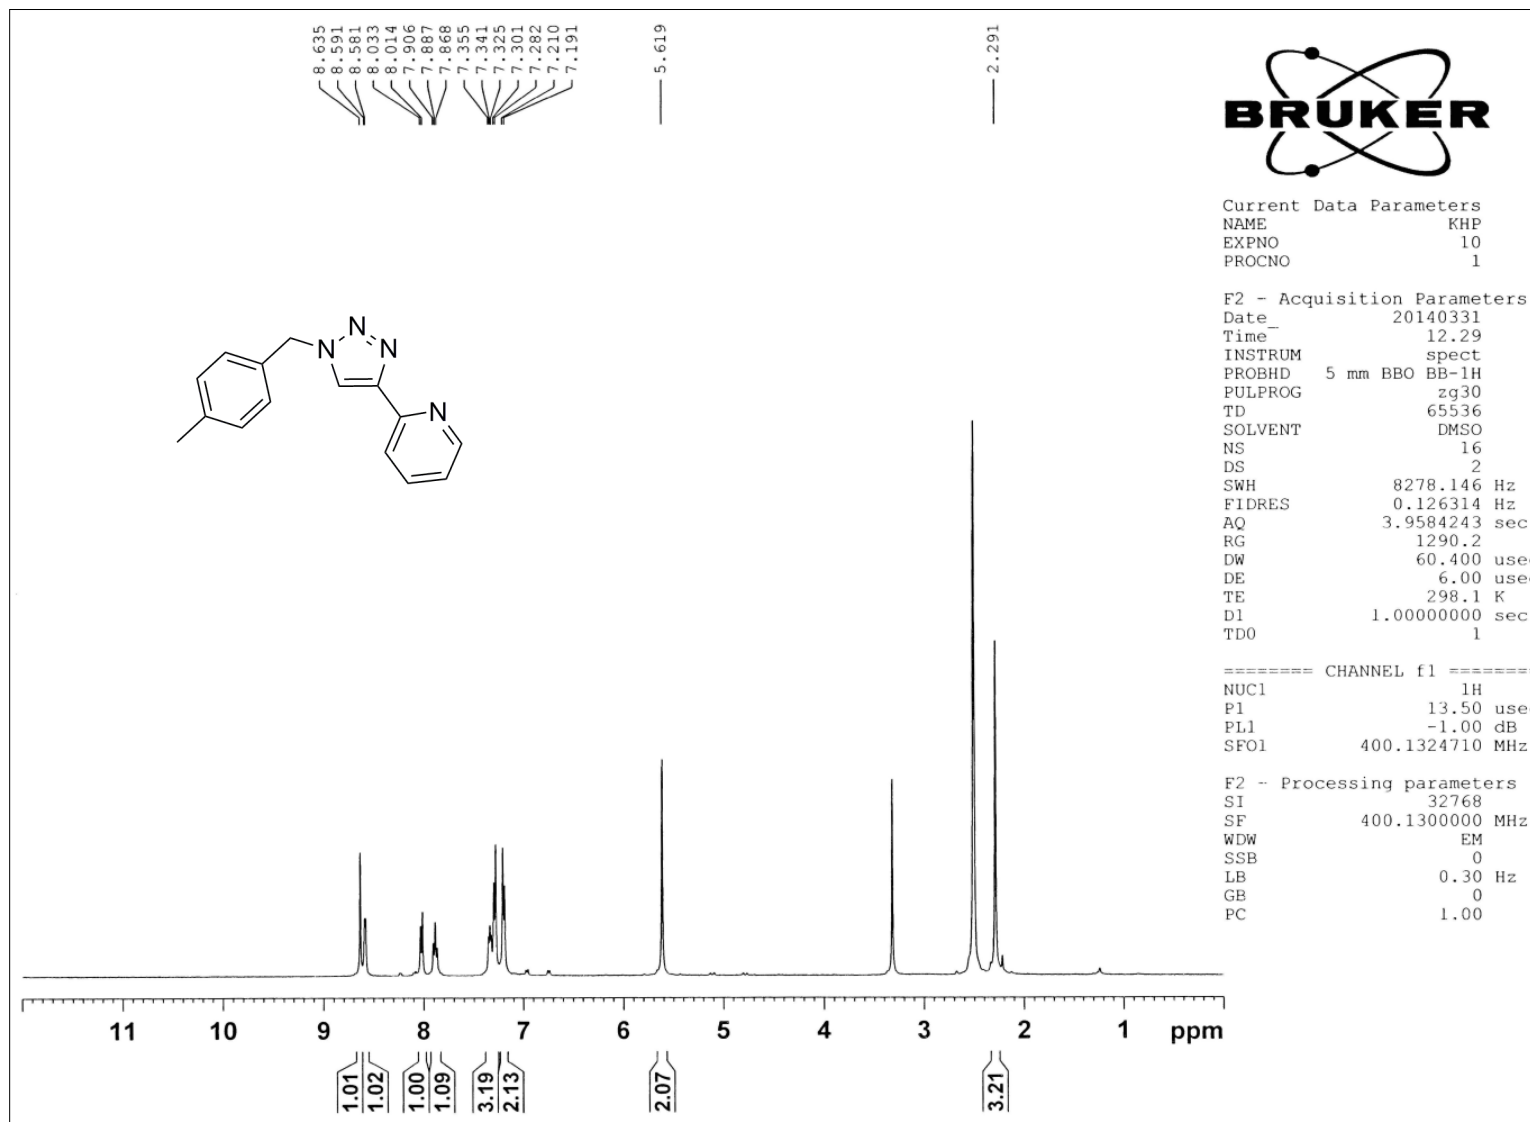

<sup>1</sup>H NMR spectra of compound 4j

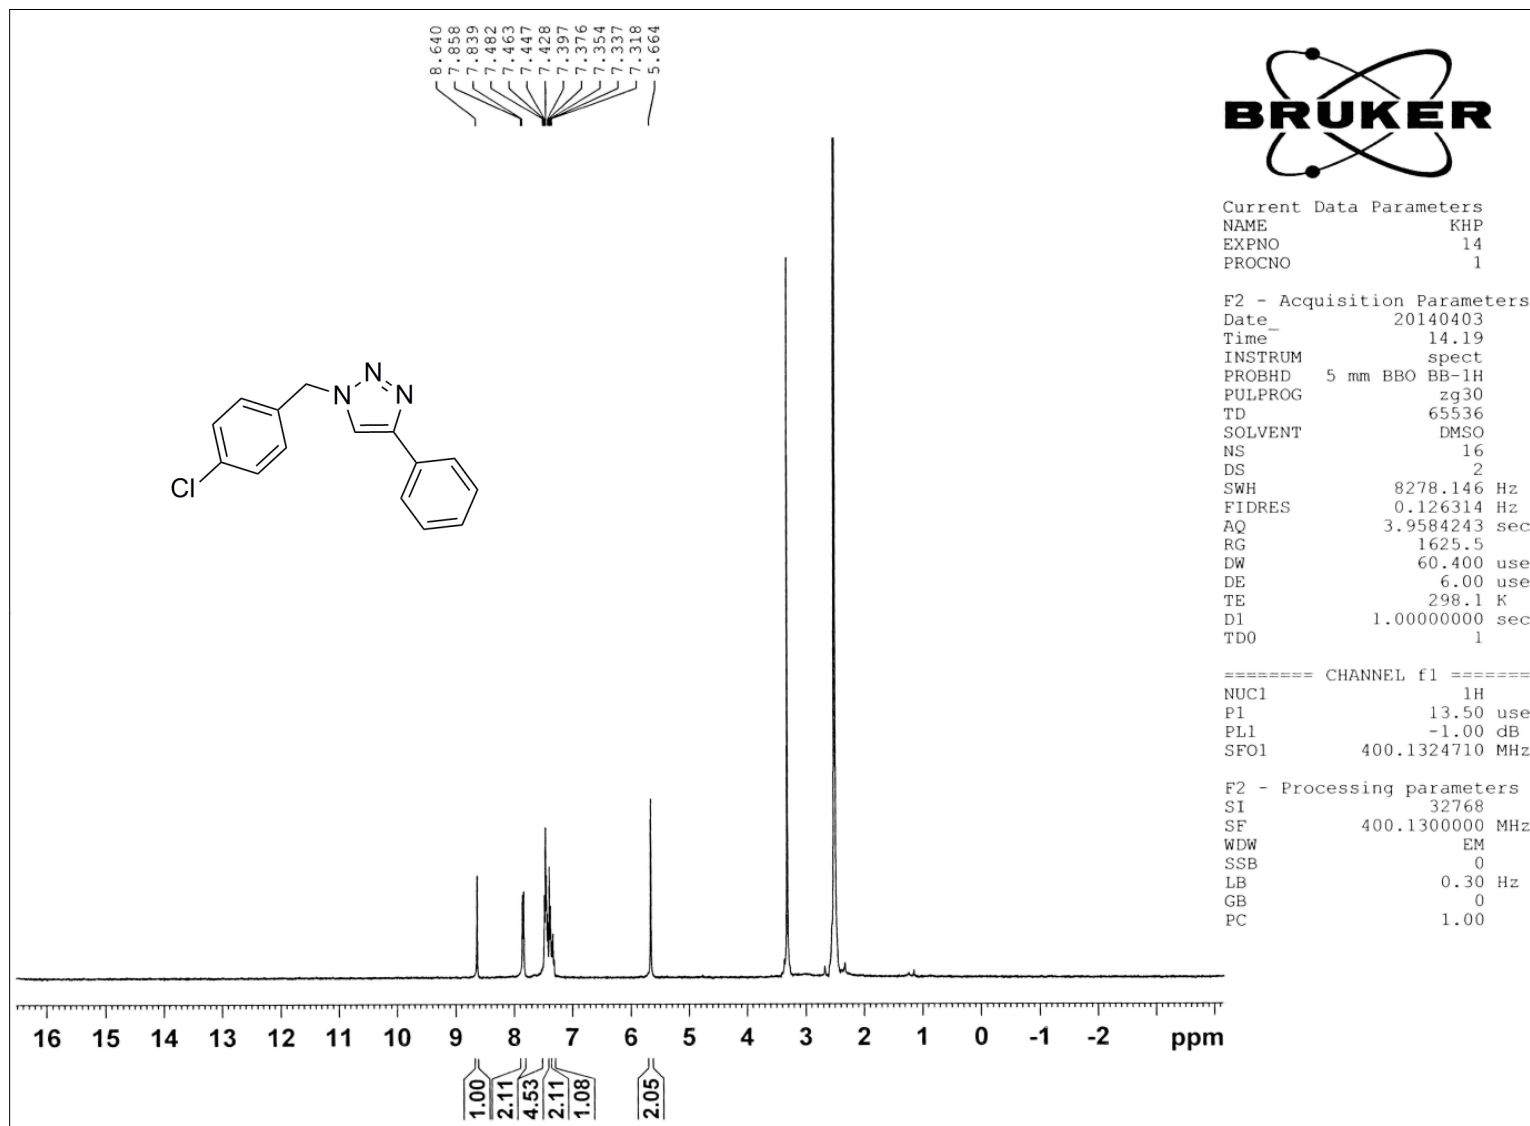

<sup>1</sup>H NMR spectra of compound 4k

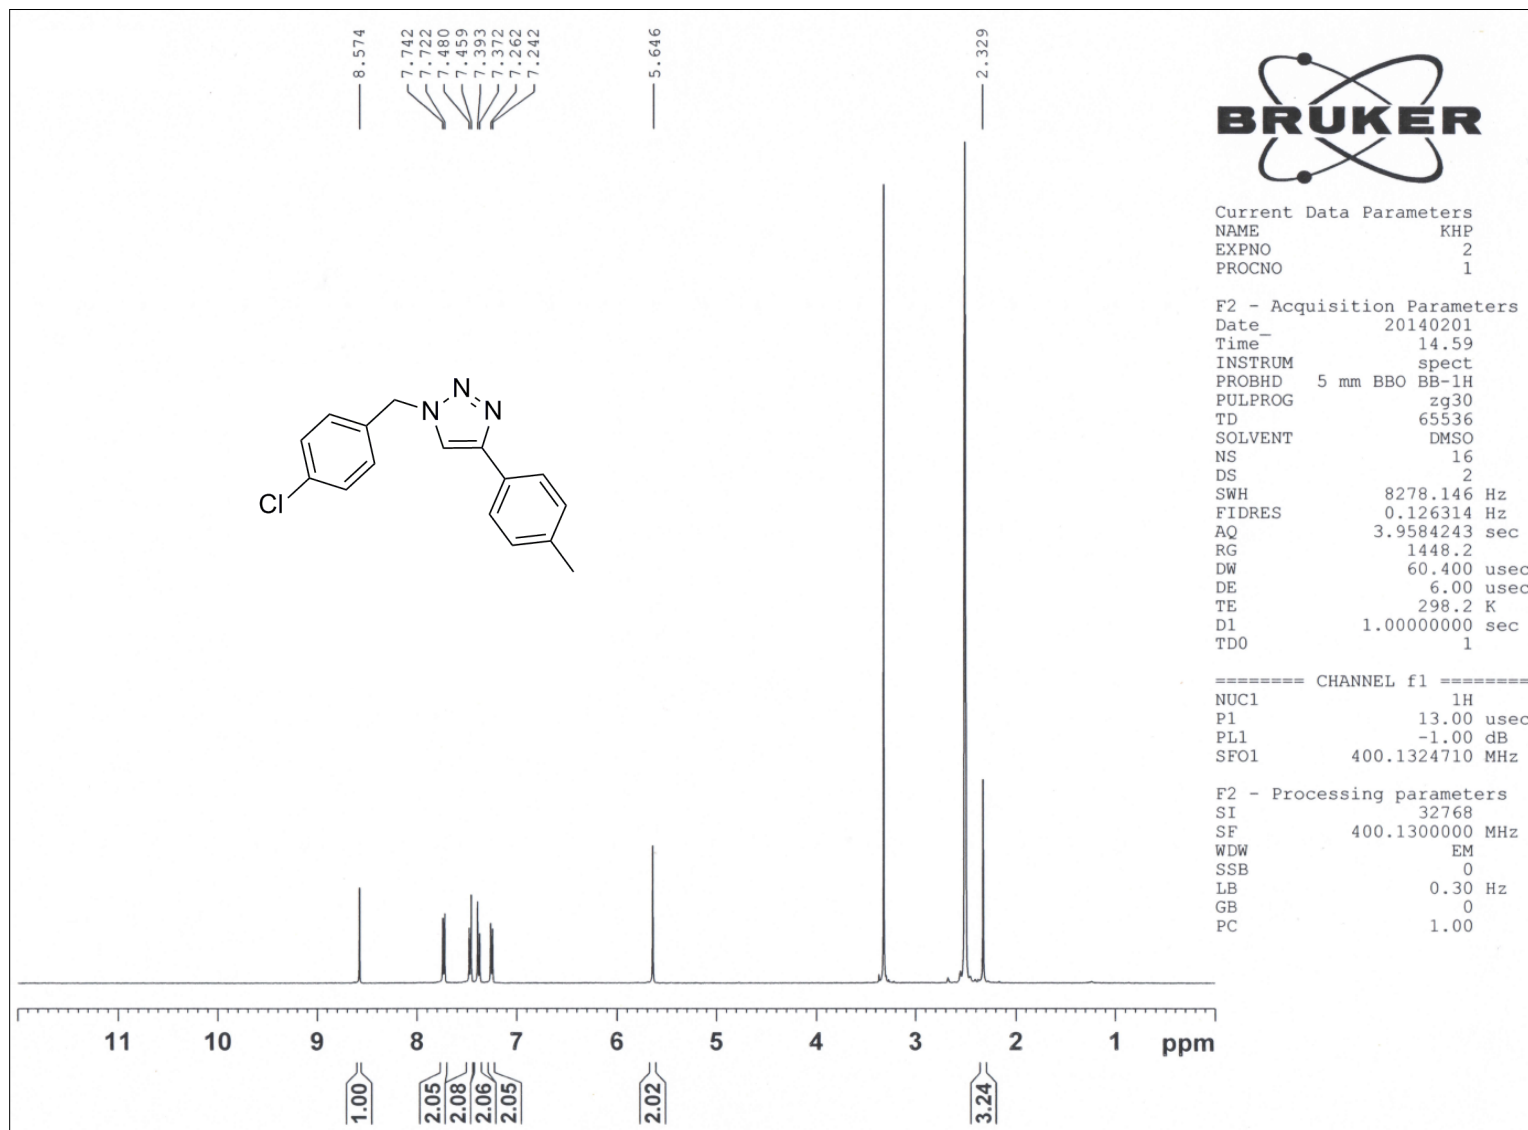

<sup>1</sup>H NMR spectra of compound **4l**

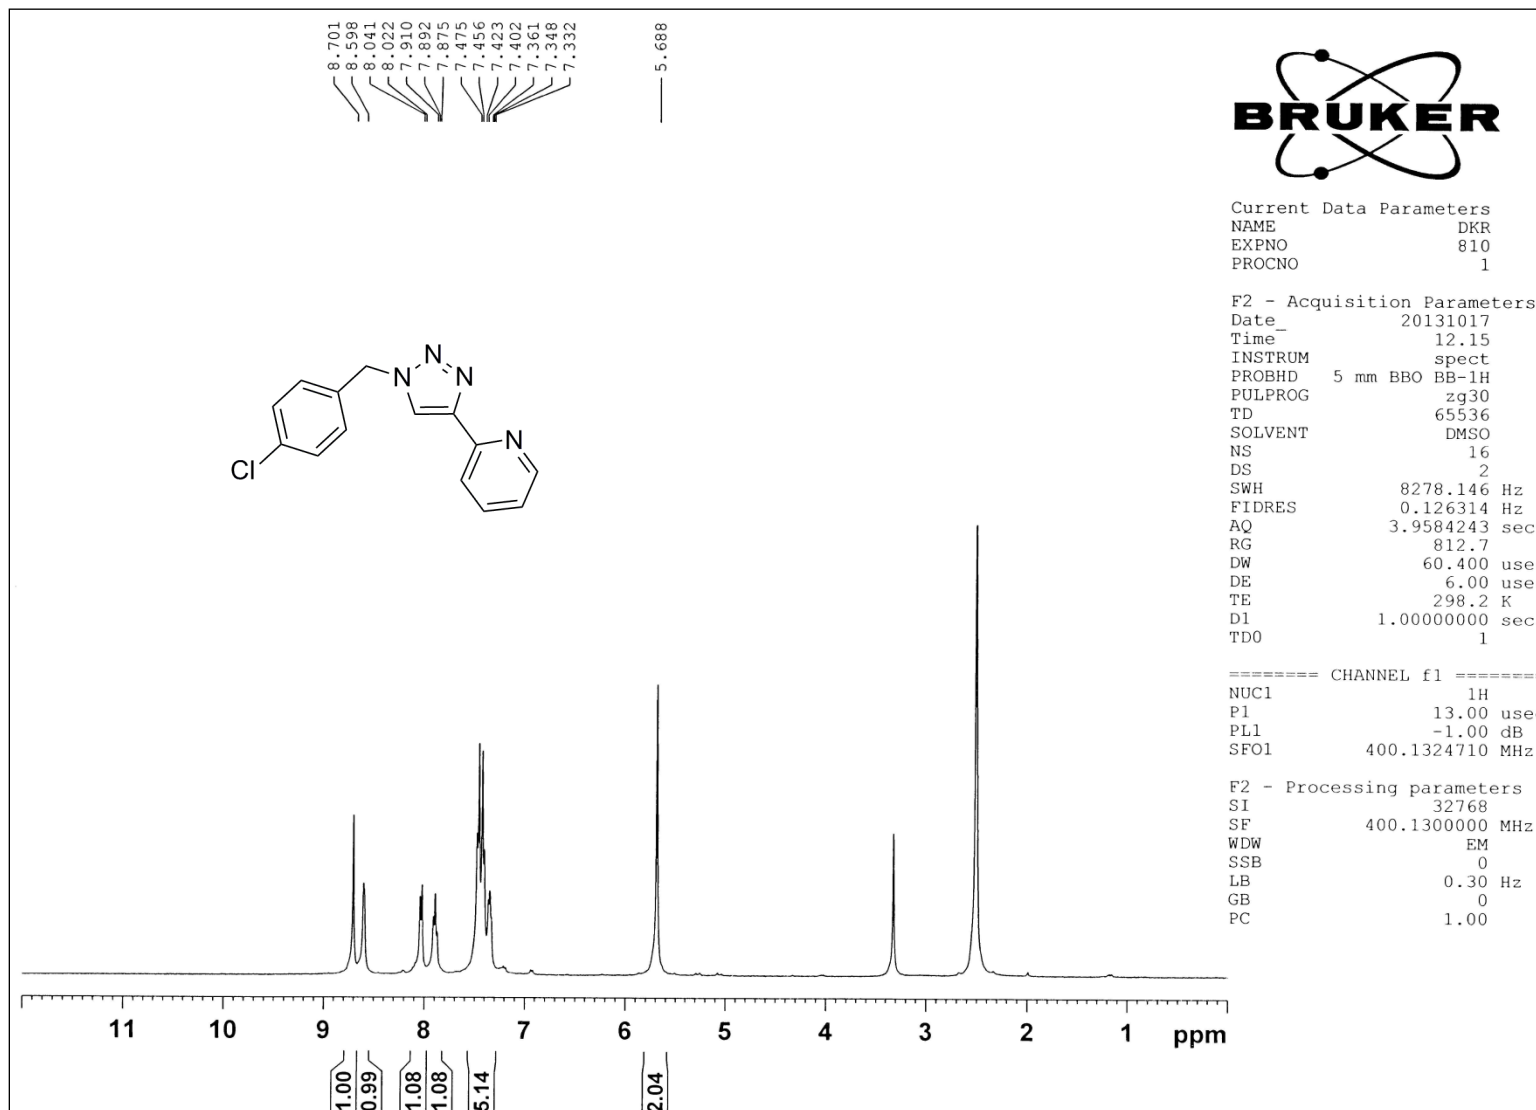

<sup>1</sup>H NMR spectra of compound **4m**

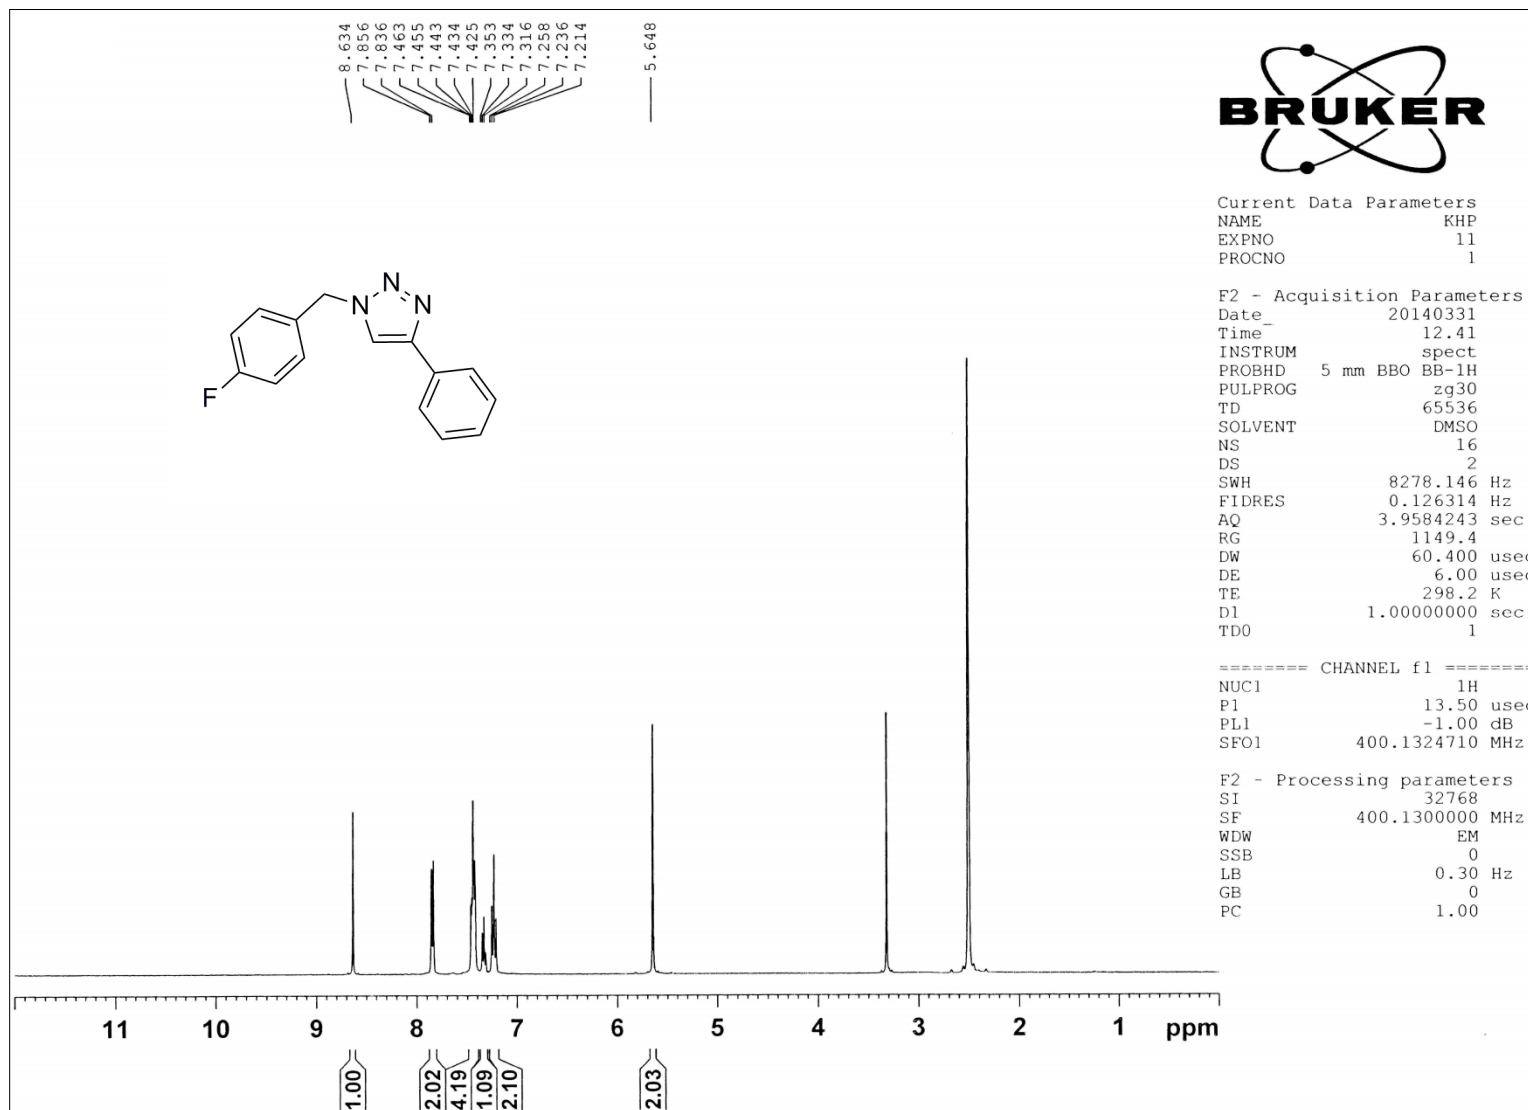

<sup>1</sup>H NMR spectra of compound 4n

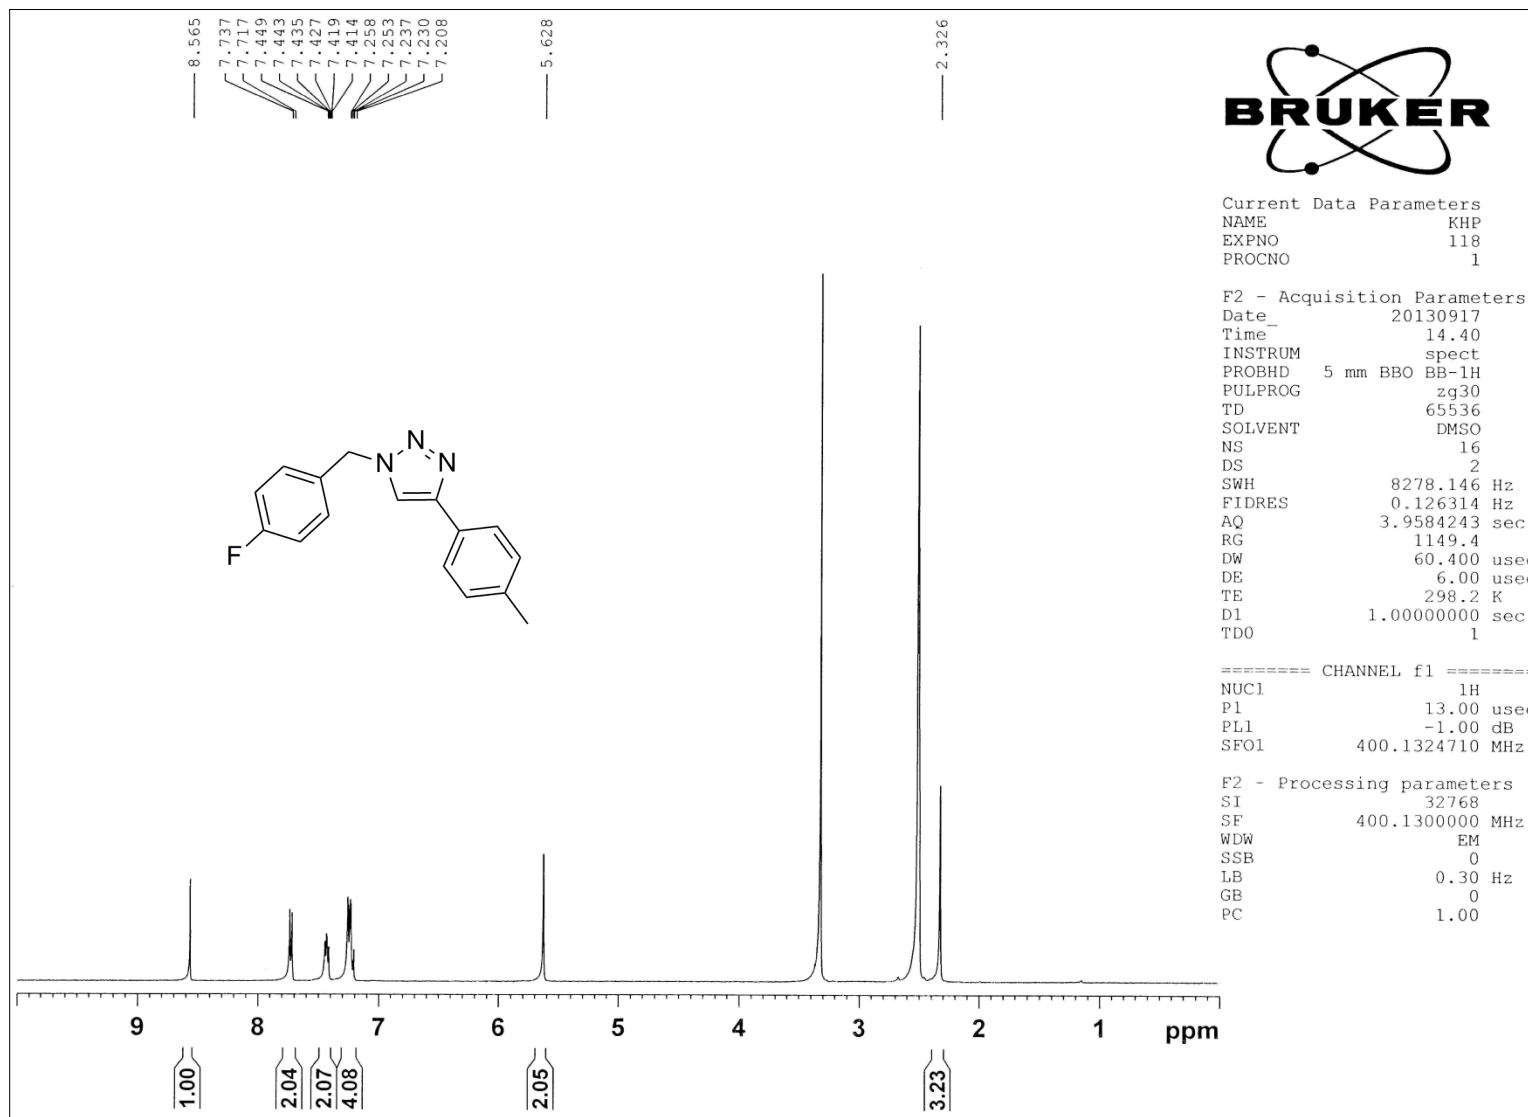



<sup>1</sup>H NMR spectra of compound 4o

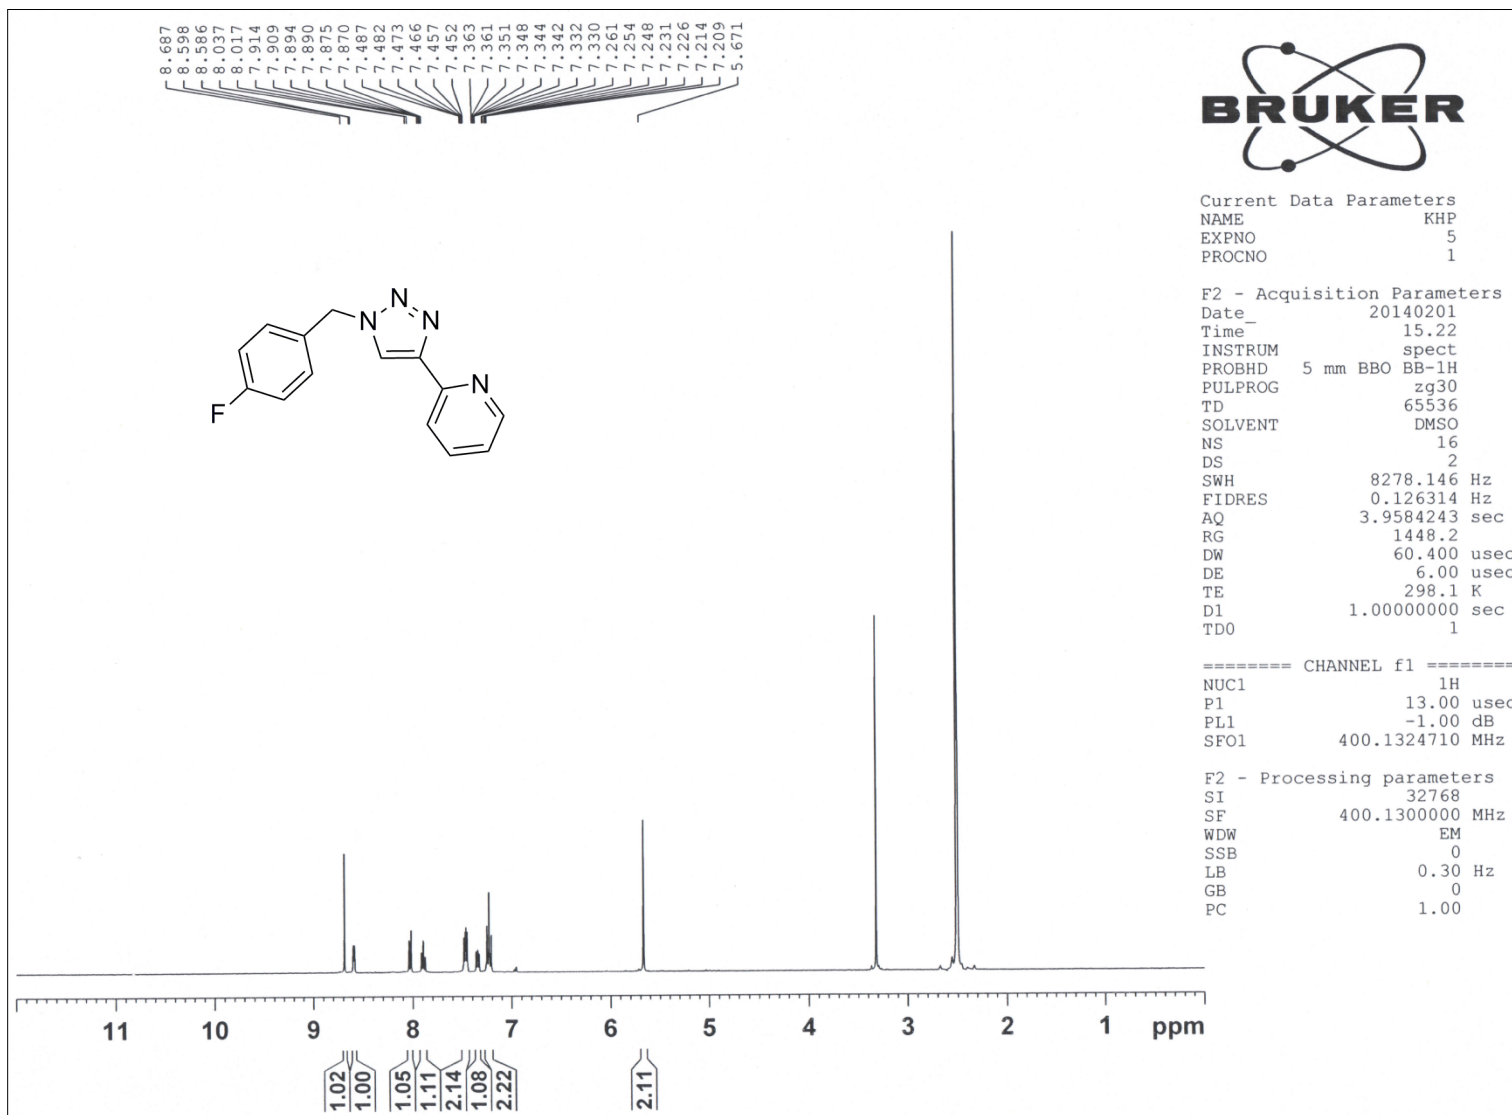

<sup>13</sup>C NMR spectra of compound 4f

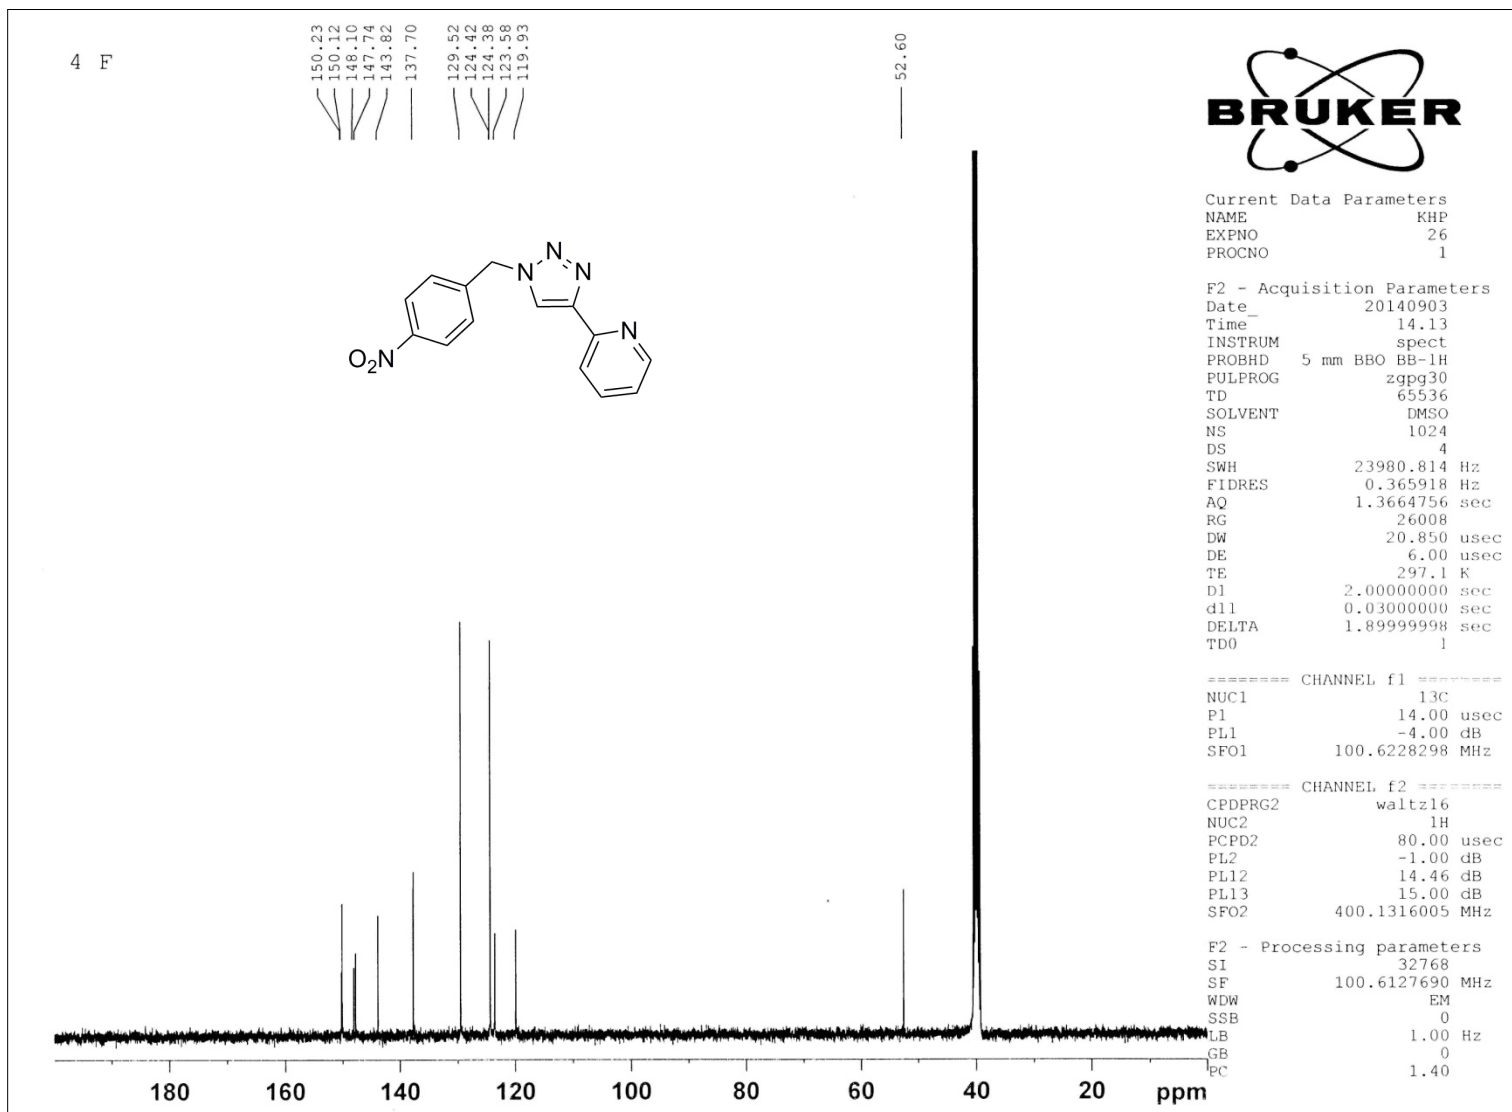

<sup>13</sup>C NMR spectra of compound 4g

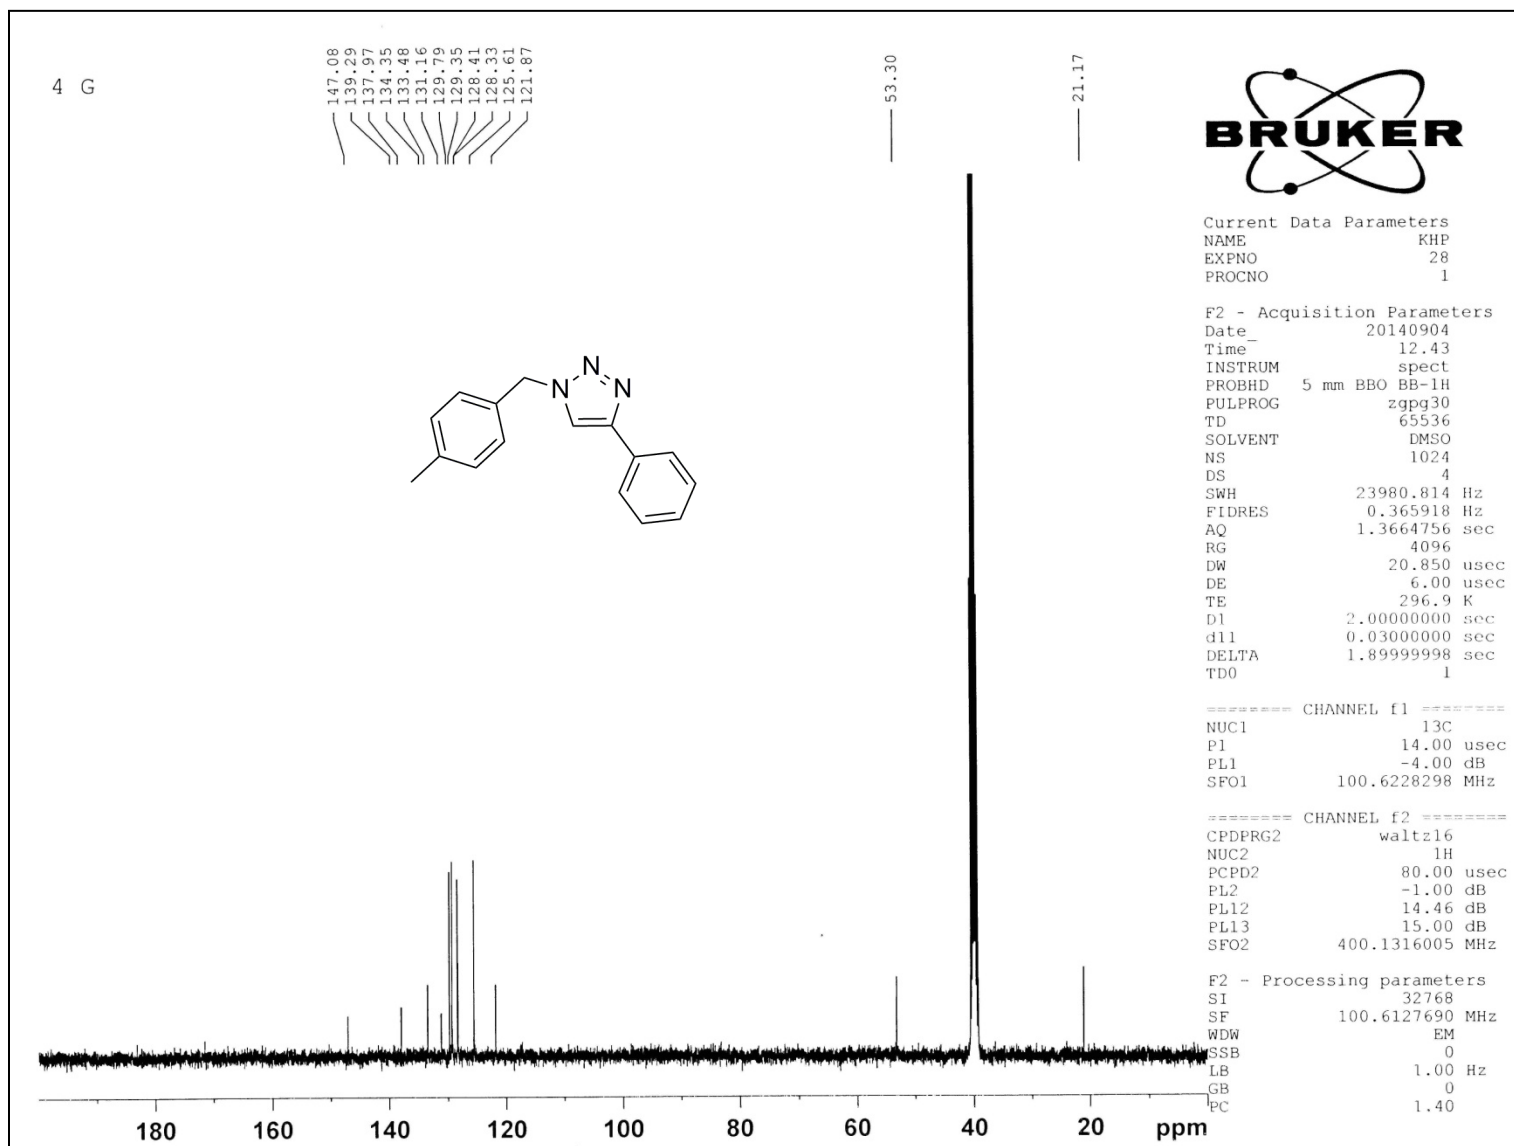

<sup>13</sup>C NMR spectra of compound 4i

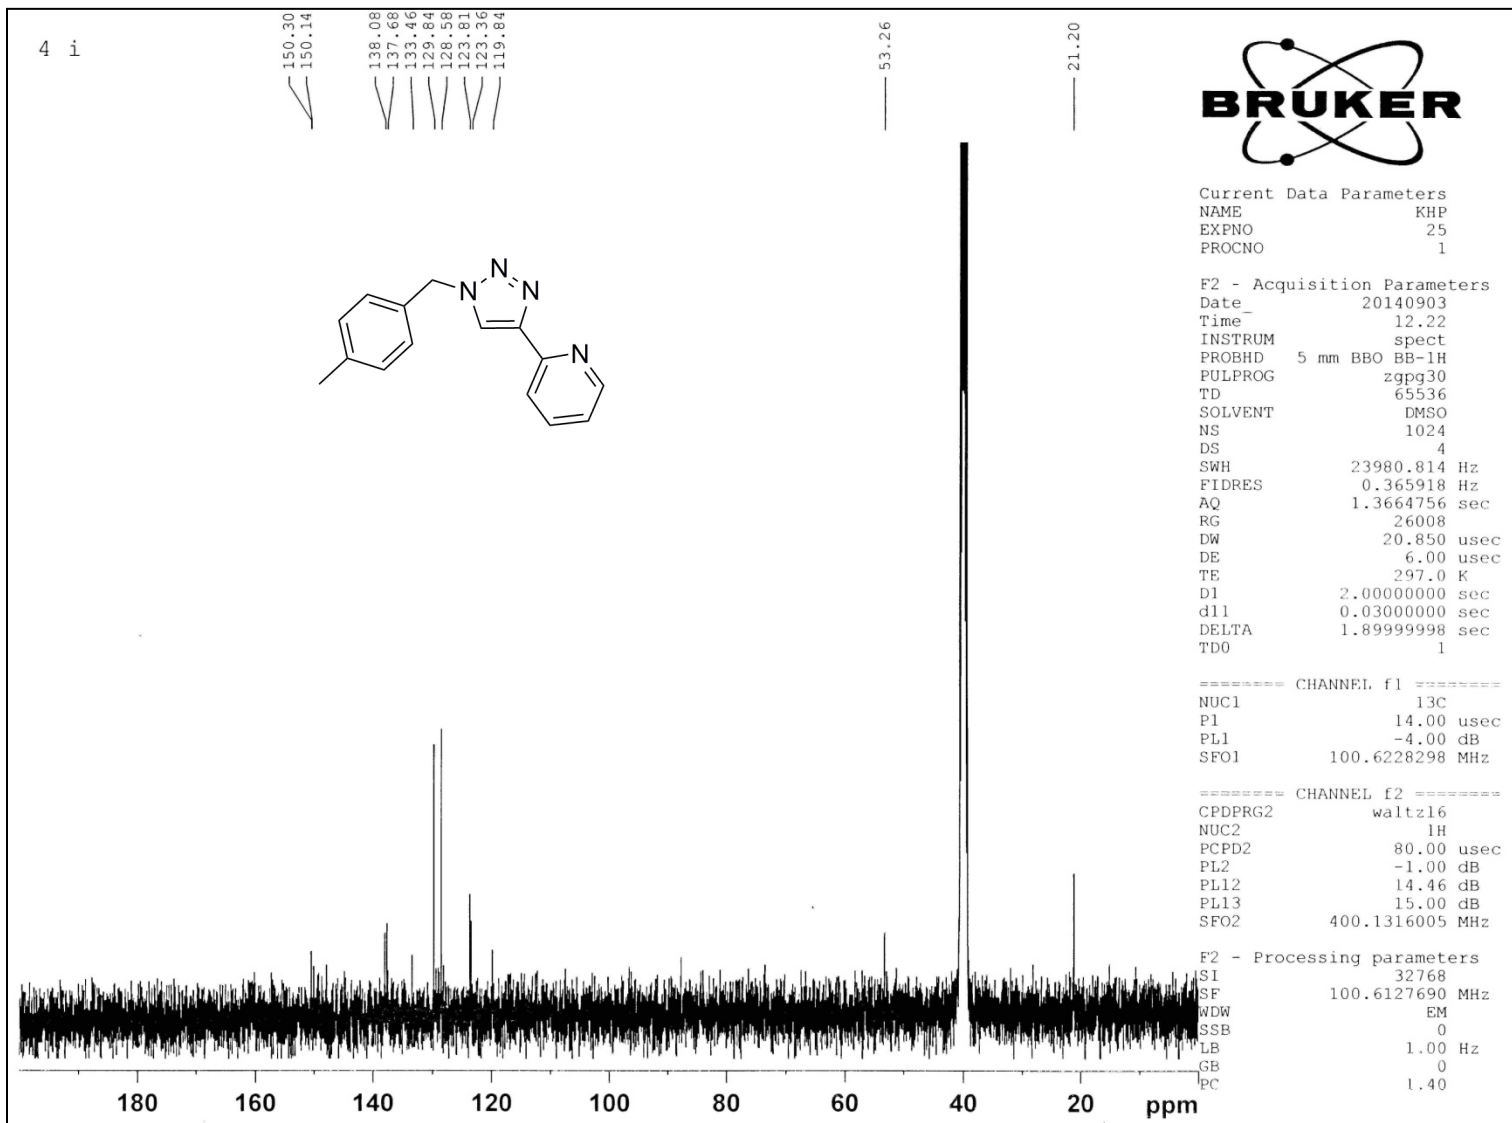

<sup>13</sup>C NMR spectra of compound 4k

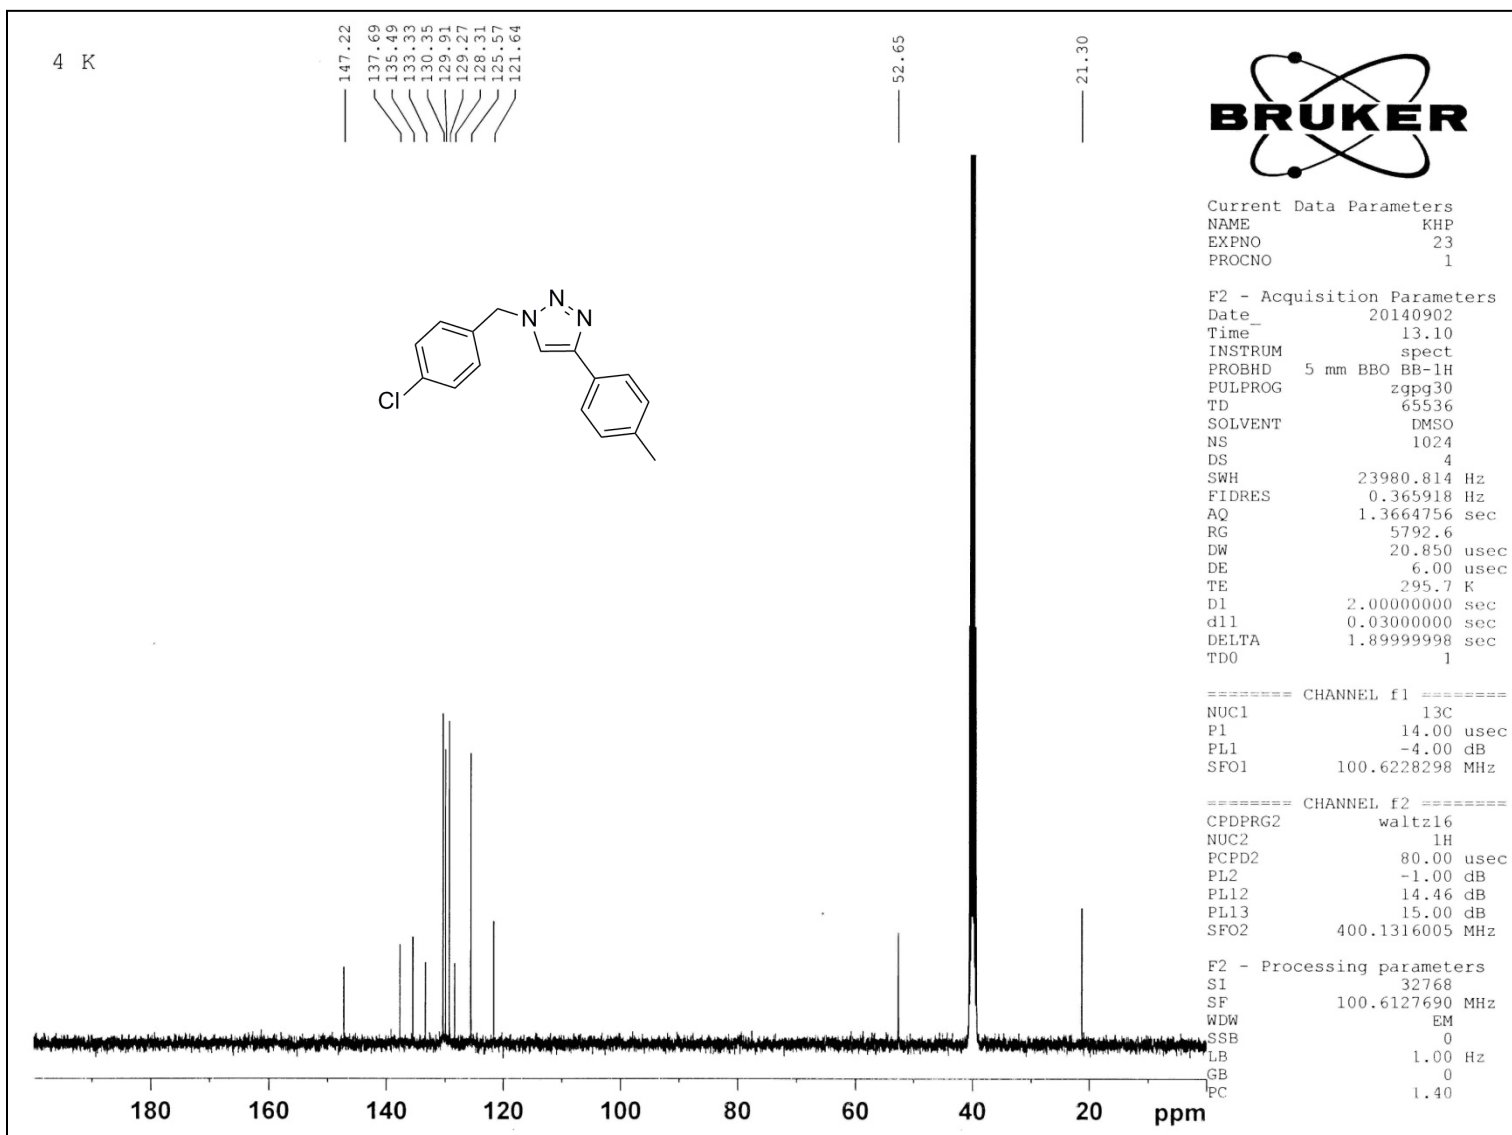

<sup>13</sup>C NMR spectra of compound **41**

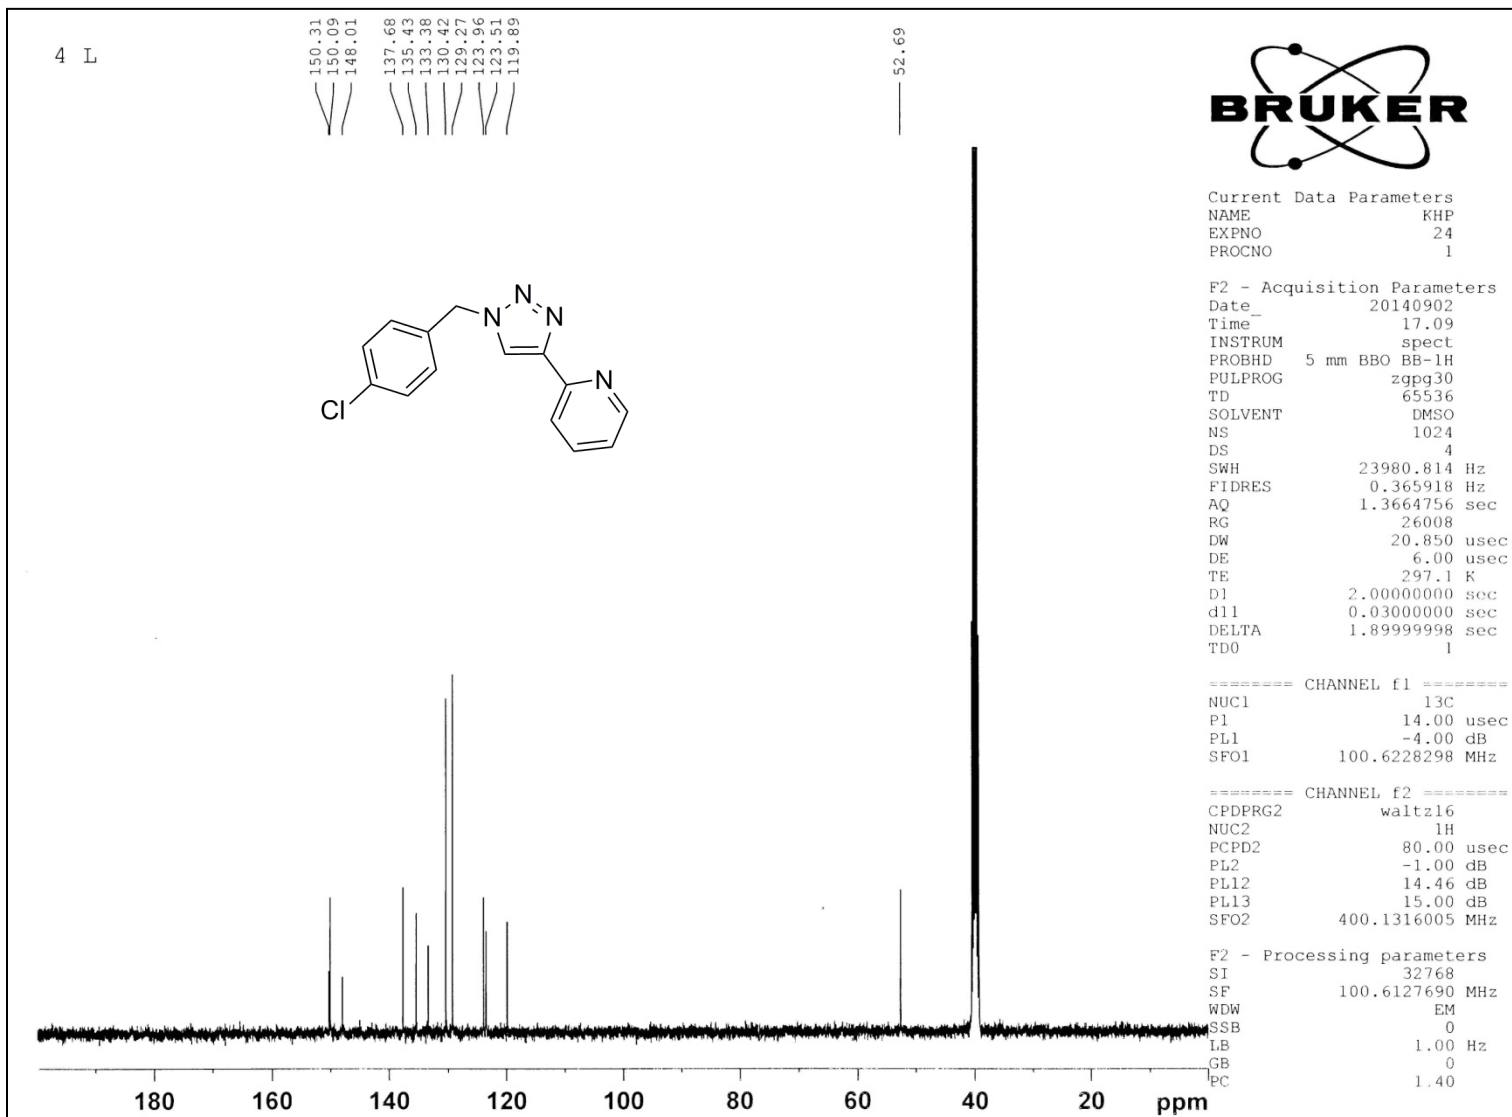

<sup>13</sup>C NMR spectra of compound 4o

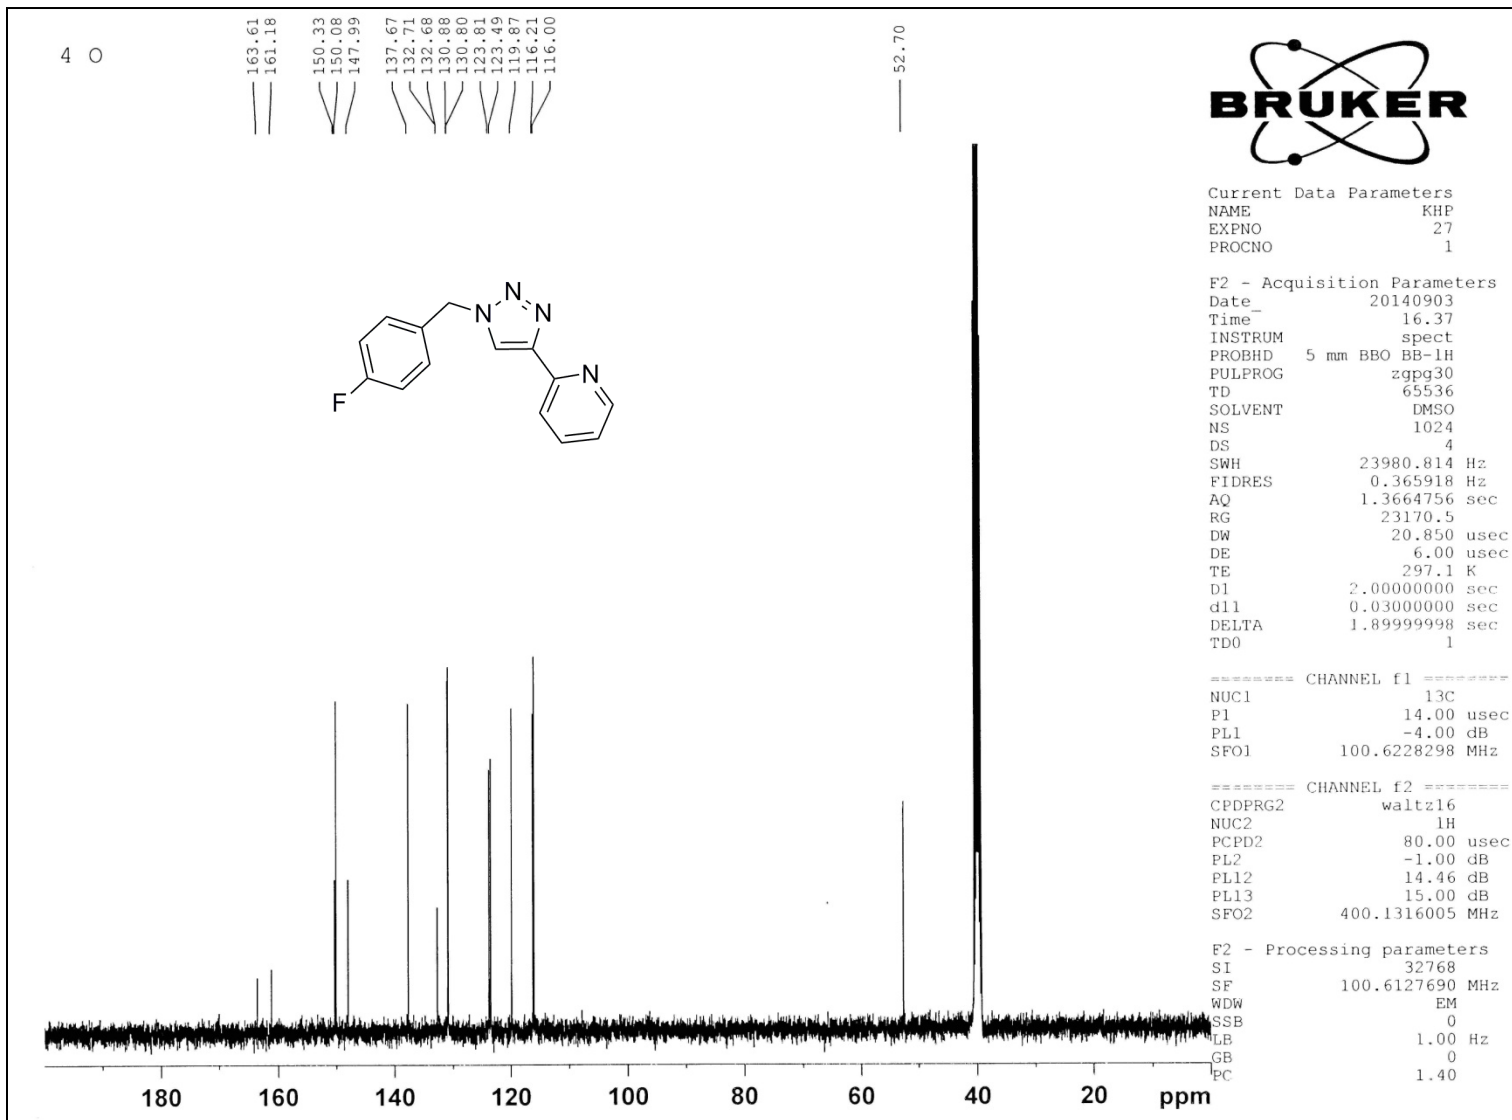

Supplement: c4ra08412h1.pdf [file c4ra08412h1.pdf]
